# Supplementary material
Source: publisher site journal article supplement (https://www.spandidos-publications.com/1857/downloadSupplementary)
Supplement: Supplementary file 1 [file downloadSupplementary]

## Sheet: Table S2
Table SII. All the signal pathways associated with oral squamous cell carcinoma were identified.
id	Description	Significant	Annotated	Pvalue	Qvalue	Signi_id	Signi_symbol
ko04110	Cell cycle	20/305	125/7736	7.39479e-08	1.80588e-05	ENSG00000166851(1.86101855387),ENSG00000104738(1.82547251885),ENSG00000135446(1.57928119232),ENSG00000118971(2.2816161225),ENSG00000127564(2.03624887274),ENSG00000164109(1.29095866706),ENSG00000253729(1.34061295177),ENSG00000105810(1.64541072673),ENSG00000101224(2.50832991134),ENSG00000145604(1.60497964918),ENSG00000085840(2.06784728096),ENSG00000097046(1.72925008258),ENSG00000091651(2.0454314854…	PLK1(1.86101855387),MCM4(1.82547251885),CDK4(1.57928119232),CCND2(2.2816161225),PKMYT1(2.03624887274),MAD2L1(1.29095866706),PRKDC(1.34061295177),CDK6(1.64541072673),CDC25B(2.50832991134),SKP2(1.60497964918),ORC1(2.06784728096),CDC7(1.72925008258),ORC6(2.04543148548),CDC6(2.77904312003),MCM2(2.73222560206),E2F1(2.26891884404),CHEK1(2.08558929488),CDC45(2.28160479207),CDC20(1.72069533456),MCM5(2.04…
ko04113	Meiosis - yeast	12/305	57/7736	1.63187e-06	0.00019926	ENSG00000104738(1.82547251885),ENSG00000142875(-1.58645760792),ENSG00000164109(1.29095866706),ENSG00000085840(2.06784728096),ENSG00000097046(1.72925008258),ENSG00000091651(2.04543148548),ENSG00000094804(2.77904312003),ENSG00000073111(2.73222560206),ENSG00000149554(2.08558929488),ENSG00000093009(2.28160479207),ENSG00000117399(1.72069533456),ENSG00000100297(2.04371059521)	MCM4(1.82547251885),PRKACB(-1.58645760792),MAD2L1(1.29095866706),ORC1(2.06784728096),CDC7(1.72925008258),ORC6(2.04543148548),CDC6(2.77904312003),MCM2(2.73222560206),CHEK1(2.08558929488),CDC45(2.28160479207),CDC20(1.72069533456),MCM5(2.04371059521)
ko04111	Cell cycle - yeast	13/305	70/7736	2.69596e-06	0.000219461	ENSG00000104738(1.82547251885),ENSG00000164109(1.29095866706),ENSG00000085840(2.06784728096),ENSG00000097046(1.72925008258),ENSG00000091651(2.04543148548),ENSG00000094804(2.77904312003),ENSG00000121152(2.09813420426),ENSG00000073111(2.73222560206),ENSG00000149554(2.08558929488),ENSG00000173207(1.82830363009),ENSG00000093009(2.28160479207),ENSG00000117399(1.72069533456),ENSG00000100297(2.043710595…	MCM4(1.82547251885),MAD2L1(1.29095866706),ORC1(2.06784728096),CDC7(1.72925008258),ORC6(2.04543148548),CDC6(2.77904312003),NCAPH(2.09813420426),MCM2(2.73222560206),CHEK1(2.08558929488),CKS1B(1.82830363009),CDC45(2.28160479207),CDC20(1.72069533456),MCM5(2.04371059521)
ko04970	Salivary secretion	12/305	86/7736	0.000126519	0.00772431	ENSG00000171195(-9.40532276543),ENSG00000126549(-8.23701172727),ENSG00000161798(-6.42136821712),ENSG00000142875(-1.58645760792),ENSG00000117983(-6.72168034619),ENSG00000178372(2.28405698116),ENSG00000187908(-6.61944120051),ENSG00000090382(-6.91855006269),ENSG00000167419(-9.03785451847),ENSG00000069849(1.96826475113),ENSG00000169252(-2.27869339667),ENSG00000104783(-2.0270825132)	MUC7(-9.40532276543),STATH(-8.23701172727),AQP5(-6.42136821712),PRKACB(-1.58645760792),MUC5B(-6.72168034619),CALML5(2.28405698116),DMBT1(-6.61944120051),LYZ(-6.91855006269),LPO(-9.03785451847),ATP1B3(1.96826475113),ADRB2(-2.27869339667),KCNN4(-2.0270825132)
ko05200	Pathways in cancer	30/305	392/7736	0.000344685	0.0168352	ENSG00000196611(5.43577490534),ENSG00000051180(1.79748502098),ENSG00000050628(-1.94492351554),ENSG00000058085(3.60737768008),ENSG00000140285(-2.56956441411),ENSG00000115415(2.41661405209),ENSG00000074047(2.53240919732),ENSG00000135446(1.57928119232),ENSG00000161958(2.06942181785),ENSG00000188153(2.5277966654),ENSG00000142875(-1.58645760792),ENSG00000176533(-2.48032893421),ENSG00000015475(2.086898…	MMP1(5.43577490534),RAD51(1.79748502098),PTGER3(-1.94492351554),LAMC2(3.60737768008),FGF7(-2.56956441411),STAT1(2.41661405209),GLI2(2.53240919732),CDK4(1.57928119232),FGF11(2.06942181785),COL4A5(2.5277966654),PRKACB(-1.58645760792),GNG7(-2.48032893421),BID(2.08689841431),CDK6(1.64541072673),WNT7B(2.29636644288),SKP2(1.60497964918),COL4A6(3.58238531866),CXCL8(5.55269743382),LAMB3(2.01060054618),PT…
ko05144	Malaria	8/305	47/7736	0.000437116	0.0177914	ENSG00000188536(-2.79266584767),ENSG00000213088(-1.8781197655),ENSG00000244734(-3.02357523375),ENSG00000125538(3.55477624544),ENSG00000169429(5.55269743382),ENSG00000206172(-2.76650112116),ENSG00000108342(4.42742638414),ENSG00000136732(-1.78540445508)	HBA2(-2.79266584767),ACKR1(-1.8781197655),HBB(-3.02357523375),IL1B(3.55477624544),CXCL8(5.55269743382),HBA1(-2.76650112116),CSF3(4.42742638414),GYPC(-1.78540445508)
ko04974	Protein digestion and absorption	11/305	95/7736	0.00121392	0.0423502	ENSG00000123500(3.70761897288),ENSG00000188153(2.5277966654),ENSG00000114270(1.86704661633),ENSG00000175538(-2.58806558589),ENSG00000092068(2.1979889737),ENSG00000197565(3.58238531866),ENSG00000069849(1.96826475113),ENSG00000196739(2.75542122465),ENSG00000168003(1.90443894745),ENSG00000187955(-3.46876798608),ENSG00000104783(-2.0270825132)	COL10A1(3.70761897288),COL4A5(2.5277966654),COL7A1(1.86704661633),KCNE3(-2.58806558589),SLC7A8(2.1979889737),COL4A6(3.58238531866),ATP1B3(1.96826475113),COL27A1(2.75542122465),SLC3A2(1.90443894745),COL14A1(-3.46876798608),KCNN4(-2.0270825132)
ko05222	Small cell lung cancer	10/305	85/7736	0.0017789	0.0543033	ENSG00000058085(3.60737768008),ENSG00000135446(1.57928119232),ENSG00000188153(2.5277966654),ENSG00000105810(1.64541072673),ENSG00000145604(1.60497964918),ENSG00000197565(3.58238531866),ENSG00000196878(2.01060054618),ENSG00000073756(3.08279875766),ENSG00000101412(2.26891884404),ENSG00000173207(1.82830363009)	LAMC2(3.60737768008),CDK4(1.57928119232),COL4A5(2.5277966654),CDK6(1.64541072673),SKP2(1.60497964918),COL4A6(3.58238531866),LAMB3(2.01060054618),PTGS2(3.08279875766),E2F1(2.26891884404),CKS1B(1.82830363009)
ko05206	MicroRNAs in cancer	13/305	138/7736	0.00302779	0.0821577	ENSG00000026025(-1.12858974562),ENSG00000100234(-1.95004596221),ENSG00000118971(2.2816161225),ENSG00000122707(-1.7523884028),ENSG00000105810(1.64541072673),ENSG00000101224(2.50832991134),ENSG00000128710(2.44760136919),ENSG00000073756(3.08279875766),ENSG00000136158(-1.56172052691),ENSG00000146670(2.36409935377),ENSG00000149948(4.13039604035),ENSG00000101412(2.26891884404),ENSG00000138061(-1.799636…	VIM(-1.12858974562),TIMP3(-1.95004596221),CCND2(2.2816161225),RECK(-1.7523884028),CDK6(1.64541072673),CDC25B(2.50832991134),HOXD10(2.44760136919),PTGS2(3.08279875766),SPRY2(-1.56172052691),CDCA5(2.36409935377),HMGA2(4.13039604035),E2F1(2.26891884404),CYP1B1(-1.79963671198)
ko04060	Cytokine-cytokine receptor interaction	21/305	286/7736	0.00435701	0.0995479	ENSG00000037280(-1.82626495613),ENSG00000099985(3.60507269565),ENSG00000122756(-5.82228684797),ENSG00000116678(-3.08075332626),ENSG00000277632(2.56989808033),ENSG00000163735(6.7180312493),ENSG00000163739(2.63012975243),ENSG00000169248(3.8533234288),ENSG00000169245(3.25972180587),ENSG00000125538(3.55477624544),ENSG00000172724(-3.10917279583),ENSG00000137070(-1.9723987721),ENSG00000081985(3.3360033…	FLT4(-1.82626495613),OSM(3.60507269565),CNTFR(-5.82228684797),LEPR(-3.08075332626),CCL3(2.56989808033),CXCL5(6.7180312493),CXCL1(2.63012975243),CXCL11(3.8533234288),CXCL10(3.25972180587),IL1B(3.55477624544),CCL19(-3.10917279583),IL11RA(-1.9723987721),IL12RB2(3.33600338012),CCL21(-4.56934925983),CXCL8(5.55269743382),CSF3(4.42742638414),CXCL12(-4.50458837234),LIFR(-2.36224572694),VEGFC(-1.768677216…
ko04923	Regulation of lipolysis in adipocyte	7/305	53/7736	0.00448395	0.0995479	ENSG00000050628(-1.94492351554),ENSG00000164128(-5.94554777833),ENSG00000170323(-3.77005881113),ENSG00000142875(-1.58645760792),ENSG00000177666(-1.07993206484),ENSG00000073756(3.08279875766),ENSG00000169252(-2.27869339667)	PTGER3(-1.94492351554),NPY1R(-5.94554777833),FABP4(-3.77005881113),PRKACB(-1.58645760792),PNPLA2(-1.07993206484),PTGS2(3.08279875766),ADRB2(-2.27869339667)
ko04640	Hematopoietic cell lineage	9/305	84/7736	0.0056043	0.114052	ENSG00000012124(-1.78535693083),ENSG00000072274(2.84835228579),ENSG00000125538(3.55477624544),ENSG00000272398(-2.15071438134),ENSG00000158481(-2.51541409513),ENSG00000137070(-1.9723987721),ENSG00000104894(-1.73828269328),ENSG00000108342(4.42742638414),ENSG00000177455(-2.62379346353)	CD22(-1.78535693083),TFRC(2.84835228579),IL1B(3.55477624544),CD24(-2.15071438134),CD1C(-2.51541409513),IL11RA(-1.9723987721),CD37(-1.73828269328),CSF3(4.42742638414),CD19(-2.62379346353)
ko00982	Drug metabolism - cytochrome P450	8/305	72/7736	0.00710599	0.133489	ENSG00000196616(-6.5653559564),ENSG00000240224(-5.37378985467),ENSG00000138356(-2.54127522598),ENSG00000069535(-2.67559468043),ENSG00000243955(-5.8211453057),ENSG00000010932(-1.8191172754),ENSG00000131781(-1.92116080987),ENSG00000106258(-2.46922390116)	ADH1B(-6.5653559564),UGT1A5(-5.37378985467),AOX1(-2.54127522598),MAOB(-2.67559468043),GSTA1(-5.8211453057),FMO1(-1.8191172754),FMO5(-1.92116080987),CYP3A5(-2.46922390116)
ko00950	Isoquinoline alkaloid biosynthesis	3/305	7736-11-01	0.00790944	0.137969	ENSG00000104951(2.25862710552),ENSG00000069535(-2.67559468043),ENSG00000131471(-1.85950896828)	IL4I1(2.25862710552),MAOB(-2.67559468043),AOC3(-1.85950896828)
ko04062	Chemokine signaling pathway	15/305	192/7736	0.00873428	0.1422	ENSG00000115415(2.41661405209),ENSG00000142875(-1.58645760792),ENSG00000277632(2.56989808033),ENSG00000176533(-2.48032893421),ENSG00000163735(6.7180312493),ENSG00000163739(2.63012975243),ENSG00000169248(3.8533234288),ENSG00000169245(3.25972180587),ENSG00000172724(-3.10917279583),ENSG00000137077(-4.56934925983),ENSG00000169429(5.55269743382),ENSG00000068831(-2.23413888574),ENSG00000127920(-1.29890…	STAT1(2.41661405209),PRKACB(-1.58645760792),CCL3(2.56989808033),GNG7(-2.48032893421),CXCL5(6.7180312493),CXCL1(2.63012975243),CXCL11(3.8533234288),CXCL10(3.25972180587),CCL19(-3.10917279583),CCL21(-4.56934925983),CXCL8(5.55269743382),RASGRP2(-2.23413888574),GNG11(-1.29890712957),CXCL12(-4.50458837234),CCL11(3.23266469762)
ko05160	Hepatitis C	12/305	141/7736	0.00959485	0.144592	ENSG00000165215(-2.59024682993),ENSG00000107201(2.70637111339),ENSG00000115415(2.41661405209),ENSG00000013297(-2.84754831402),ENSG00000111331(2.83636896276),ENSG00000111335(2.82156917844),ENSG00000171217(4.77376456154),ENSG00000169429(5.55269743382),ENSG00000213928(1.60661650933),ENSG00000134873(-8.32343151422),ENSG00000253958(-2.83424274172),ENSG00000185745(5.00359198649)	CLDN3(-2.59024682993),DDX58(2.70637111339),STAT1(2.41661405209),CLDN11(-2.84754831402),OAS3(2.83636896276),OAS2(2.82156917844),CLDN20(4.77376456154),CXCL8(5.55269743382),IRF9(1.60661650933),CLDN10(-8.32343151422),CLDN23(-2.83424274172),IFIT1(5.00359198649)
ko05146	Amoebiasis	9/305	92/7736	0.0100654	0.144592	ENSG00000058085(3.60737768008),ENSG00000188153(2.5277966654),ENSG00000142875(-1.58645760792),ENSG00000125538(3.55477624544),ENSG00000197565(3.58238531866),ENSG00000156049(-2.54527574272),ENSG00000169429(5.55269743382),ENSG00000196878(2.01060054618),ENSG00000141404(-1.76114681841)	LAMC2(3.60737768008),COL4A5(2.5277966654),PRKACB(-1.58645760792),IL1B(3.55477624544),COL4A6(3.58238531866),GNA14(-2.54527574272),CXCL8(5.55269743382),LAMB3(2.01060054618),GNAL(-1.76114681841)
ko00350	Tyrosine metabolism	5/305	36/7736	0.0127382	0.172823	ENSG00000196616(-6.5653559564),ENSG00000104951(2.25862710552),ENSG00000138356(-2.54127522598),ENSG00000069535(-2.67559468043),ENSG00000131471(-1.85950896828)	ADH1B(-6.5653559564),IL4I1(2.25862710552),AOX1(-2.54127522598),MAOB(-2.67559468043),AOC3(-1.85950896828)
ko03030	DNA replication	5/305	37/7736	0.0142664	0.183368	ENSG00000104738(1.82547251885),ENSG00000168496(2.27486738339),ENSG00000104889(2.18179318973),ENSG00000073111(2.73222560206),ENSG00000100297(2.04371059521)	MCM4(1.82547251885),FEN1(2.27486738339),RNASEH2A(2.18179318973),MCM2(2.73222560206),MCM5(2.04371059521)
ko00380	Tryptophan metabolism	5/305	39/7736	0.0176816	0.215901	ENSG00000104951(2.25862710552),ENSG00000138356(-2.54127522598),ENSG00000069535(-2.67559468043),ENSG00000002726(-2.76434863414),ENSG00000138061(-1.79963671198)	IL4I1(2.25862710552),AOX1(-2.54127522598),MAOB(-2.67559468043),AOC1(-2.76434863414),CYP1B1(-1.79963671198)
ko05219	Bladder cancer	5/305	42/7736	0.0237514	0.276207	ENSG00000196611(5.43577490534),ENSG00000135446(1.57928119232),ENSG00000169429(5.55269743382),ENSG00000101412(2.26891884404),ENSG00000025708(2.90776987846)	MMP1(5.43577490534),CDK4(1.57928119232),CXCL8(5.55269743382),E2F1(2.26891884404),TYMP(2.90776987846)
ko00360	Phenylalanine metabolism	3/305	17/7736	0.0273742	0.302212	ENSG00000104951(2.25862710552),ENSG00000069535(-2.67559468043),ENSG00000131471(-1.85950896828)	IL4I1(2.25862710552),MAOB(-2.67559468043),AOC3(-1.85950896828)
ko00983	Drug metabolism - other enzymes	5/305	44/7736	0.0284626	0.302212	ENSG00000240224(-5.37378985467),ENSG00000165704(1.86288127787),ENSG00000198848(-4.20174409564),ENSG00000167900(2.44271517601),ENSG00000025708(2.90776987846)	UGT1A5(-5.37378985467),HPRT1(1.86288127787),CES1(-4.20174409564),TK1(2.44271517601),TYMP(2.90776987846)
ko00330	Arginine and proline metabolism	5/305	46/7736	0.0337271	0.337276	ENSG00000104524(1.97712190212),ENSG00000069535(-2.67559468043),ENSG00000115758(2.63573404818),ENSG00000088826(2.04480641593),ENSG00000002726(-2.76434863414)	PYCR3(1.97712190212),MAOB(-2.67559468043),ODC1(2.63573404818),SMOX(2.04480641593),AOC1(-2.76434863414)
ko05162	Measles	11/305	150/7736	0.0345272	0.337276	ENSG00000107201(2.70637111339),ENSG00000115415(2.41661405209),ENSG00000135446(1.57928119232),ENSG00000118971(2.2816161225),ENSG00000157601(3.11675940882),ENSG00000111331(2.83636896276),ENSG00000111335(2.82156917844),ENSG00000105810(1.64541072673),ENSG00000115267(2.17093086577),ENSG00000125538(3.55477624544),ENSG00000213928(1.60661650933)	DDX58(2.70637111339),STAT1(2.41661405209),CDK4(1.57928119232),CCND2(2.2816161225),MX1(3.11675940882),OAS3(2.83636896276),OAS2(2.82156917844),CDK6(1.64541072673),IFIH1(2.17093086577),IL1B(3.55477624544),IRF9(1.60661650933)
ko04913	Ovarian Steroidogenesis	5/305	47/7736	0.0365714	0.343505	ENSG00000142875(-1.58645760792),ENSG00000073756(3.08279875766),ENSG00000196139(2.37686417996),ENSG00000147465(3.10530343991),ENSG00000138061(-1.79963671198)	PRKACB(-1.58645760792),PTGS2(3.08279875766),AKR1C3(2.37686417996),STAR(3.10530343991),CYP1B1(-1.79963671198)
ko04340	Hedgehog signaling pathway	5/305	48/7736	0.039559	0.357805	ENSG00000074047(2.53240919732),ENSG00000143147(2.77525863053),ENSG00000118971(2.2816161225),ENSG00000142875(-1.58645760792),ENSG00000144857(-1.48774490914)	GLI2(2.53240919732),GPR161(2.77525863053),CCND2(2.2816161225),PRKACB(-1.58645760792),BOC(-1.48774490914)
ko04630	Jak-STAT signaling pathway	11/305	155/7736	0.042263	0.368609	ENSG00000099985(3.60507269565),ENSG00000138356(-2.54127522598),ENSG00000122756(-5.82228684797),ENSG00000116678(-3.08075332626),ENSG00000115415(2.41661405209),ENSG00000118971(2.2816161225),ENSG00000137070(-1.9723987721),ENSG00000081985(3.33600338012),ENSG00000213928(1.60661650933),ENSG00000108342(4.42742638414),ENSG00000113594(-2.36224572694)	OSM(3.60507269565),AOX1(-2.54127522598),CNTFR(-5.82228684797),LEPR(-3.08075332626),STAT1(2.41661405209),CCND2(2.2816161225),IL11RA(-1.9723987721),IL12RB2(3.33600338012),IRF9(1.60661650933),CSF3(4.42742638414),LIFR(-2.36224572694)
ko04115	p53 signaling pathway	6/305	66/7736	0.04492	0.378274	ENSG00000135446(1.57928119232),ENSG00000118971(2.2816161225),ENSG00000080546(-1.06777448027),ENSG00000015475(2.08689841431),ENSG00000105810(1.64541072673),ENSG00000149554(2.08558929488)	CDK4(1.57928119232),CCND2(2.2816161225),SESN1(-1.06777448027),BID(2.08689841431),CDK6(1.64541072673),CHEK1(2.08558929488)
ko05143	African trypanosomiasis	4/305	37/7736	0.0563834	0.458981	ENSG00000188536(-2.79266584767),ENSG00000244734(-3.02357523375),ENSG00000125538(3.55477624544),ENSG00000206172(-2.76650112116)	HBA2(-2.79266584767),HBB(-3.02357523375),IL1B(3.55477624544),HBA1(-2.76650112116)
ko00340	Histidine metabolism	3/305	23/7736	0.0600079	0.472728	ENSG00000069535(-2.67559468043),ENSG00000150540(-2.21529320358),ENSG00000002726(-2.76434863414)	MAOB(-2.67559468043),HNMT(-2.21529320358),AOC1(-2.76434863414)
ko05224	Breast cancer	10/305	148/7736	0.0671262	0.49737	ENSG00000037280(-1.82626495613),ENSG00000140285(-2.56956441411),ENSG00000135446(1.57928119232),ENSG00000161958(2.06942181785),ENSG00000105810(1.64541072673),ENSG00000188064(2.29636644288),ENSG00000164930(1.43789101887),ENSG00000101412(2.26891884404),ENSG00000184916(2.46413838573),ENSG00000170345(-2.48416997805)	FLT4(-1.82626495613),FGF7(-2.56956441411),CDK4(1.57928119232),FGF11(2.06942181785),CDK6(1.64541072673),WNT7B(2.29636644288),FZD6(1.43789101887),E2F1(2.26891884404),JAG2(2.46413838573),FOS(-2.48416997805)
ko03320	PPAR signaling pathway	6/305	73/7736	0.0672506	0.49737	ENSG00000196611(5.43577490534),ENSG00000095637(-1.95479026606),ENSG00000214456(-2.38933152985),ENSG00000170323(-3.77005881113),ENSG00000168306(-2.04734180989),ENSG00000130304(-1.57699135456)	MMP1(5.43577490534),SORBS1(-1.95479026606),PLIN5(-2.38933152985),FABP4(-3.77005881113),ACOX2(-2.04734180989),SLC27A1(-1.57699135456)
ko04310	Wnt signaling pathway	10/305	149/7736	0.0695734	0.49737	ENSG00000101096(-1.88727649793),ENSG00000104332(-3.93027544456),ENSG00000145506(2.16206139075),ENSG00000145423(-2.92529593462),ENSG00000118971(2.2816161225),ENSG00000142875(-1.58645760792),ENSG00000175592(2.59958275392),ENSG00000188064(2.29636644288),ENSG00000164930(1.43789101887),ENSG00000175792(1.53784570401)	NFATC2(-1.88727649793),SFRP1(-3.93027544456),NKD2(2.16206139075),SFRP2(-2.92529593462),CCND2(2.2816161225),PRKACB(-1.58645760792),FOSL1(2.59958275392),WNT7B(2.29636644288),FZD6(1.43789101887),RUVBL1(1.53784570401)
ko00513	Various types of N-glycan biosynthesis	4/305	40/7736	0.0712826	0.49737	ENSG00000154080(-3.04992306343),ENSG00000139044(2.79177092678),ENSG00000111885(-1.84476060244),ENSG00000117643(-1.81500632797)	CHST9(-3.04992306343),B4GALNT3(2.79177092678),MAN1A1(-1.84476060244),MAN1C1(-1.81500632797)
ko05161	Hepatitis B	10/305	151/7736	0.0746363	0.506304	ENSG00000101096(-1.88727649793),ENSG00000107201(2.70637111339),ENSG00000115415(2.41661405209),ENSG00000135446(1.57928119232),ENSG00000105810(1.64541072673),ENSG00000115267(2.17093086577),ENSG00000169429(5.55269743382),ENSG00000101412(2.26891884404),ENSG00000157613(-3.46886489473),ENSG00000170345(-2.48416997805)	NFATC2(-1.88727649793),DDX58(2.70637111339),STAT1(2.41661405209),CDK4(1.57928119232),CDK6(1.64541072673),IFIH1(2.17093086577),CXCL8(5.55269743382),E2F1(2.26891884404),CREB3L1(-3.46886489473),FOS(-2.48416997805)
ko04670	Leukocyte transendothelial migration	8/305	114/7736	0.0804748	0.52833	ENSG00000165215(-2.59024682993),ENSG00000013297(-2.84754831402),ENSG00000171217(4.77376456154),ENSG00000134873(-8.32343151422),ENSG00000116701(1.95084718703),ENSG00000253958(-2.83424274172),ENSG00000107562(-4.50458837234),ENSG00000154721(-2.13502696899)	CLDN3(-2.59024682993),CLDN11(-2.84754831402),CLDN20(4.77376456154),CLDN10(-8.32343151422),NCF2(1.95084718703),CLDN23(-2.83424274172),CXCL12(-4.50458837234),JAM2(-2.13502696899)
ko00565	Ether lipid metabolism	4/305	42/7736	0.0822226	0.52833	ENSG00000174607(2.51609825728),ENSG00000162407(-1.55382666649),ENSG00000146070(2.78165378301),ENSG00000111666(-1.69821468119)	UGT8(2.51609825728),PLPP3(-1.55382666649),PLA2G7(2.78165378301),CHPT1(-1.69821468119)
ko00980	Metabolism of xenobiotics by cytochrome P450	6/305	78/7736	0.0865368	0.52833	ENSG00000196616(-6.5653559564),ENSG00000240224(-5.37378985467),ENSG00000243955(-5.8211453057),ENSG00000197446(-2.72901663012),ENSG00000106258(-2.46922390116),ENSG00000138061(-1.79963671198)	ADH1B(-6.5653559564),UGT1A5(-5.37378985467),GSTA1(-5.8211453057),CYP2F1(-2.72901663012),CYP3A5(-2.46922390116),CYP1B1(-1.79963671198)
ko05204	Chemical carcinogenesis	6/305	78/7736	0.0865368	0.52833	ENSG00000196616(-6.5653559564),ENSG00000240224(-5.37378985467),ENSG00000243955(-5.8211453057),ENSG00000106258(-2.46922390116),ENSG00000073756(3.08279875766),ENSG00000138061(-1.79963671198)	ADH1B(-6.5653559564),UGT1A5(-5.37378985467),GSTA1(-5.8211453057),CYP3A5(-2.46922390116),PTGS2(3.08279875766),CYP1B1(-1.79963671198)
ko03450	Non-homologous end-joining	2/305	13/7736	0.0907779	0.540705	ENSG00000168496(2.27486738339),ENSG00000253729(1.34061295177)	FEN1(2.27486738339),PRKDC(1.34061295177)
ko04620	Toll-like receptor signaling pathway	8/305	119/7736	0.0973292	0.565924	ENSG00000115415(2.41661405209),ENSG00000118785(3.16038174807),ENSG00000277632(2.56989808033),ENSG00000169248(3.8533234288),ENSG00000169245(3.25972180587),ENSG00000125538(3.55477624544),ENSG00000169429(5.55269743382),ENSG00000170345(-2.48416997805)	STAT1(2.41661405209),SPP1(3.16038174807),CCL3(2.56989808033),CXCL11(3.8533234288),CXCL10(3.25972180587),IL1B(3.55477624544),CXCL8(5.55269743382),FOS(-2.48416997805)
ko05212	Pancreatic cancer	5/305	63/7736	0.101767	0.575136	ENSG00000051180(1.79748502098),ENSG00000115415(2.41661405209),ENSG00000135446(1.57928119232),ENSG00000105810(1.64541072673),ENSG00000101412(2.26891884404)	RAD51(1.79748502098),STAT1(2.41661405209),CDK4(1.57928119232),CDK6(1.64541072673),E2F1(2.26891884404)
ko04961	Endocrine and other factor-regulated calcium reabsorption	4/305	46/7736	0.106394	0.575136	ENSG00000167748(2.56312241282),ENSG00000142875(-1.58645760792),ENSG00000104327(3.87614308202),ENSG00000069849(1.96826475113)	KLK1(2.56312241282),PRKACB(-1.58645760792),CALB1(3.87614308202),ATP1B3(1.96826475113)
ko00140	Steroid hormone biosynthesis	5/305	64/7736	0.107041	0.575136	ENSG00000240224(-5.37378985467),ENSG00000151632(2.85350350785),ENSG00000106258(-2.46922390116),ENSG00000196139(2.37686417996),ENSG00000138061(-1.79963671198)	UGT1A5(-5.37378985467),AKR1C2(2.85350350785),CYP3A5(-2.46922390116),AKR1C3(2.37686417996),CYP1B1(-1.79963671198)
ko04668	TNF signaling pathway	8/305	122/7736	0.108334	0.575136	ENSG00000247077(1.6970669934),ENSG00000149968(4.97213632338),ENSG00000163739(2.63012975243),ENSG00000169245(3.25972180587),ENSG00000125538(3.55477624544),ENSG00000073756(3.08279875766),ENSG00000157613(-3.46886489473),ENSG00000170345(-2.48416997805)	PGAM5(1.6970669934),MMP3(4.97213632338),CXCL1(2.63012975243),CXCL10(3.25972180587),IL1B(3.55477624544),PTGS2(3.08279875766),CREB3L1(-3.46886489473),FOS(-2.48416997805)
ko03440	Homologous recombination	3/305	30/7736	0.11285	0.578424	ENSG00000051180(1.79748502098),ENSG00000085999(1.87960535318),ENSG00000196584(2.66313239544)	RAD51(1.79748502098),RAD54L(1.87960535318),XRCC2(2.66313239544)
ko00254	Aflatoxin biosynthesis	1/305	7736-03-01	0.11369	0.578424	ENSG00000076555(-1.50705772866)	ACACB(-1.50705772866)
ko04151	PI3K-Akt signaling pathway	18/305	337/7736	0.116532	0.580782	ENSG00000037280(-1.82626495613),ENSG00000099985(3.60507269565),ENSG00000058085(3.60737768008),ENSG00000140285(-2.56956441411),ENSG00000118785(3.16038174807),ENSG00000135446(1.57928119232),ENSG00000161958(2.06942181785),ENSG00000118971(2.2816161225),ENSG00000188153(2.5277966654),ENSG00000176533(-2.48032893421),ENSG00000105810(1.64541072673),ENSG00000197565(3.58238531866),ENSG00000196878(2.01060054…	FLT4(-1.82626495613),OSM(3.60507269565),LAMC2(3.60737768008),FGF7(-2.56956441411),SPP1(3.16038174807),CDK4(1.57928119232),FGF11(2.06942181785),CCND2(2.2816161225),COL4A5(2.5277966654),GNG7(-2.48032893421),CDK6(1.64541072673),COL4A6(3.58238531866),LAMB3(2.01060054618),GNG11(-1.29890712957),CSF3(4.42742638414),CD19(-2.62379346353),VEGFC(-1.76867721662),CREB3L1(-3.46886489473)
ko04530	Tight junction	9/305	146/7736	0.122293	0.59206	ENSG00000165215(-2.59024682993),ENSG00000013297(-2.84754831402),ENSG00000135446(1.57928119232),ENSG00000171217(4.77376456154),ENSG00000134873(-8.32343151422),ENSG00000082397(-1.37645352786),ENSG00000253958(-2.83424274172),ENSG00000133392(-1.63223692871),ENSG00000154721(-2.13502696899)	CLDN3(-2.59024682993),CLDN11(-2.84754831402),CDK4(1.57928119232),CLDN20(4.77376456154),CLDN10(-8.32343151422),EPB41L3(-1.37645352786),CLDN23(-2.83424274172),MYH11(-1.63223692871),JAM2(-2.13502696899)
ko05031	Amphetamine addiction	5/305	67/7736	0.123644	0.59206	ENSG00000069535(-2.67559468043),ENSG00000142875(-1.58645760792),ENSG00000178372(2.28405698116),ENSG00000157613(-3.46886489473),ENSG00000170345(-2.48416997805)	MAOB(-2.67559468043),PRKACB(-1.58645760792),CALML5(2.28405698116),CREB3L1(-3.46886489473),FOS(-2.48416997805)
ko05020	Prion diseases	3/305	32/7736	0.130361	0.611123	ENSG00000112936(-5.59381849248),ENSG00000142875(-1.58645760792),ENSG00000125538(3.55477624544)	C7(-5.59381849248),PRKACB(-1.58645760792),IL1B(3.55477624544)
ko04623	Cytosolic DNA-sensing pathway	5/305	69/7736	0.135336	0.611123	ENSG00000107201(2.70637111339),ENSG00000137033(-3.51656752746),ENSG00000163568(2.65238598382),ENSG00000169245(3.25972180587),ENSG00000125538(3.55477624544)	DDX58(2.70637111339),IL33(-3.51656752746),AIM2(2.65238598382),CXCL10(3.25972180587),IL1B(3.55477624544)
ko04933	AGE-RAGE signaling pathway in diabetic complications	7/305	109/7736	0.138317	0.611123	ENSG00000115415(2.41661405209),ENSG00000135446(1.57928119232),ENSG00000188153(2.5277966654),ENSG00000125538(3.55477624544),ENSG00000197565(3.58238531866),ENSG00000169429(5.55269743382),ENSG00000150630(-1.76867721662)	STAT1(2.41661405209),CDK4(1.57928119232),COL4A5(2.5277966654),IL1B(3.55477624544),COL4A6(3.58238531866),CXCL8(5.55269743382),VEGFC(-1.76867721662)
ko00740	Riboflavin metabolism	1/305	7736-04-01	0.148648	0.611123	ENSG00000160688(1.6529899055)	FLAD1(1.6529899055)
ko04662	B cell receptor signaling pathway	5/305	72/7736	0.153752	0.611123	ENSG00000101096(-1.88727649793),ENSG00000012124(-1.78535693083),ENSG00000007312(-1.96742477038),ENSG00000177455(-2.62379346353),ENSG00000170345(-2.48416997805)	NFATC2(-1.88727649793),CD22(-1.78535693083),CD79B(-1.96742477038),CD19(-2.62379346353),FOS(-2.48416997805)
ko05218	Melanoma	5/305	72/7736	0.153752	0.611123	ENSG00000140285(-2.56956441411),ENSG00000135446(1.57928119232),ENSG00000161958(2.06942181785),ENSG00000105810(1.64541072673),ENSG00000101412(2.26891884404)	FGF7(-2.56956441411),CDK4(1.57928119232),FGF11(2.06942181785),CDK6(1.64541072673),E2F1(2.26891884404)
ko04728	Dopaminergic synapse	8/305	133/7736	0.154166	0.611123	ENSG00000069535(-2.67559468043),ENSG00000142875(-1.58645760792),ENSG00000176533(-2.48032893421),ENSG00000178372(2.28405698116),ENSG00000127920(-1.29890712957),ENSG00000157613(-3.46886489473),ENSG00000141404(-1.76114681841),ENSG00000170345(-2.48416997805)	MAOB(-2.67559468043),PRKACB(-1.58645760792),GNG7(-2.48032893421),CALML5(2.28405698116),GNG11(-1.29890712957),CREB3L1(-3.46886489473),GNAL(-1.76114681841),FOS(-2.48416997805)
ko05132	Salmonella infection	6/305	92/7736	0.154574	0.611123	ENSG00000070087(3.17645113454),ENSG00000277632(2.56989808033),ENSG00000163739(2.63012975243),ENSG00000125538(3.55477624544),ENSG00000169429(5.55269743382),ENSG00000170345(-2.48416997805)	PFN2(3.17645113454),CCL3(2.56989808033),CXCL1(2.63012975243),IL1B(3.55477624544),CXCL8(5.55269743382),FOS(-2.48416997805)
ko04024	cAMP signaling pathway	11/305	197/7736	0.154702	0.611123	ENSG00000050628(-1.94492351554),ENSG00000266964(-3.0014198981),ENSG00000164128(-5.94554777833),ENSG00000142875(-1.58645760792),ENSG00000126262(5.09679467674),ENSG00000178372(2.28405698116),ENSG00000129991(3.304869314),ENSG00000069849(1.96826475113),ENSG00000169252(-2.27869339667),ENSG00000157613(-3.46886489473),ENSG00000170345(-2.48416997805)	PTGER3(-1.94492351554),FXYD1(-3.0014198981),NPY1R(-5.94554777833),PRKACB(-1.58645760792),FFAR2(5.09679467674),CALML5(2.28405698116),TNNI3(3.304869314),ATP1B3(1.96826475113),ADRB2(-2.27869339667),CREB3L1(-3.46886489473),FOS(-2.48416997805)
ko00120	Primary bile acid biosynthesis	2/305	18/7736	0.156912	0.611123	ENSG00000138135(-1.76293828141),ENSG00000168306(-2.04734180989)	CH25H(-1.76293828141),ACOX2(-2.04734180989)
ko00040	Pentose and glucuronate interconversions	3/305	35/7736	0.158247	0.611123	ENSG00000240224(-5.37378985467),ENSG00000165475(-1.35588143093),ENSG00000085662(2.36763359627)	UGT1A5(-5.37378985467),CRYL1(-1.35588143093),AKR1B1(2.36763359627)
ko04610	Complement and coagulation cascades	6/305	93/7736	0.160156	0.611123	ENSG00000112936(-5.59381849248),ENSG00000198734(-3.55714475132),ENSG00000149131(-1.46161027373),ENSG00000197766(-2.57383871762),ENSG00000126218(-3.30818447325),ENSG00000120885(-1.56401451562)	C7(-5.59381849248),F5(-3.55714475132),SERPING1(-1.46161027373),CFD(-2.57383871762),F10(-3.30818447325),CLU(-1.56401451562)
ko05133	Pertussis	6/305	93/7736	0.160156	0.611123	ENSG00000163735(6.7180312493),ENSG00000125538(3.55477624544),ENSG00000178372(2.28405698116),ENSG00000149131(-1.46161027373),ENSG00000169429(5.55269743382),ENSG00000170345(-2.48416997805)	CXCL5(6.7180312493),IL1B(3.55477624544),CALML5(2.28405698116),SERPING1(-1.46161027373),CXCL8(5.55269743382),FOS(-2.48416997805)
ko03460	Fanconi anemia pathway	4/305	54/7736	0.162845	0.611822	ENSG00000051180(1.79748502098),ENSG00000136492(2.10939708918),ENSG00000175643(2.28157873632),ENSG00000077152(2.05209507657)	RAD51(1.79748502098),BRIP1(2.10939708918),RMI2(2.28157873632),UBE2T(2.05209507657)
ko00400	Phenylalanine, tyrosine and tryptophan biosynthesis	1/305	7736-05-01	0.18223	0.650099	ENSG00000104951(2.25862710552)	IL4I1(2.25862710552)
ko00440	Phosphonate and phosphinate metabolism	1/305	7736-05-01	0.18223	0.650099	ENSG00000111666(-1.69821468119)	CHPT1(-1.69821468119)
ko00960	Tropane, piperidine and pyridine alkaloid biosynthesis	1/305	7736-05-01	0.18223	0.650099	ENSG00000131471(-1.85950896828)	AOC3(-1.85950896828)
ko04064	NF-kappa B signaling pathway	7/305	118/7736	0.183802	0.650099	ENSG00000107201(2.70637111339),ENSG00000125538(3.55477624544),ENSG00000172724(-3.10917279583),ENSG00000137077(-4.56934925983),ENSG00000169429(5.55269743382),ENSG00000073756(3.08279875766),ENSG00000107562(-4.50458837234)	DDX58(2.70637111339),IL1B(3.55477624544),CCL19(-3.10917279583),CCL21(-4.56934925983),CXCL8(5.55269743382),PTGS2(3.08279875766),CXCL12(-4.50458837234)
ko00590	Arachidonic acid metabolism	4/305	57/7736	0.186343	0.650099	ENSG00000107317(-4.7460533032),ENSG00000073756(3.08279875766),ENSG00000196139(2.37686417996),ENSG00000179477(5.65764802034)	PTGDS(-4.7460533032),PTGS2(3.08279875766),AKR1C3(2.37686417996),ALOX12B(5.65764802034)
ko04622	RIG-I-like receptor signaling pathway	5/305	78/7736	0.193424	0.659401	ENSG00000107201(2.70637111339),ENSG00000187608(4.76343174692),ENSG00000169245(3.25972180587),ENSG00000115267(2.17093086577),ENSG00000169429(5.55269743382)	DDX58(2.70637111339),ISG15(4.76343174692),CXCL10(3.25972180587),IFIH1(2.17093086577),CXCL8(5.55269743382)
ko00830	Retinol metabolism	4/305	58/7736	0.19441	0.659401	ENSG00000196616(-6.5653559564),ENSG00000240224(-5.37378985467),ENSG00000138356(-2.54127522598),ENSG00000106258(-2.46922390116)	ADH1B(-6.5653559564),UGT1A5(-5.37378985467),AOX1(-2.54127522598),CYP3A5(-2.46922390116)
ko01522	Endocrine resistance	6/305	101/7736	0.207733	0.680278	ENSG00000135446(1.57928119232),ENSG00000142875(-1.58645760792),ENSG00000101412(2.26891884404),ENSG00000184916(2.46413838573),ENSG00000100290(2.67530874517),ENSG00000170345(-2.48416997805)	CDK4(1.57928119232),PRKACB(-1.58645760792),E2F1(2.26891884404),JAG2(2.46413838573),BIK(2.67530874517),FOS(-2.48416997805)
ko00260	Glycine, serine and threonine metabolism	3/305	40/7736	0.208162	0.680278	ENSG00000069535(-2.67559468043),ENSG00000178445(4.48963948504),ENSG00000131471(-1.85950896828)	MAOB(-2.67559468043),GLDC(4.48963948504),AOC3(-1.85950896828)
ko04916	Melanogenesis	6/305	102/7736	0.21401	0.680278	ENSG00000142875(-1.58645760792),ENSG00000188064(2.29636644288),ENSG00000178372(2.28405698116),ENSG00000136160(-2.05869802385),ENSG00000164930(1.43789101887),ENSG00000157613(-3.46886489473)	PRKACB(-1.58645760792),WNT7B(2.29636644288),CALML5(2.28405698116),EDNRB(-2.05869802385),FZD6(1.43789101887),CREB3L1(-3.46886489473)
ko04911	Insulin secretion	5/305	81/7736	0.214489	0.680278	ENSG00000142875(-1.58645760792),ENSG00000069849(1.96826475113),ENSG00000104783(-2.0270825132),ENSG00000157613(-3.46886489473),ENSG00000117394(1.72659061611)	PRKACB(-1.58645760792),ATP1B3(1.96826475113),KCNN4(-2.0270825132),CREB3L1(-3.46886489473),SLC2A1(1.72659061611)
ko00750	Vitamin B6 metabolism	1/305	7736-06-01	0.214493	0.680278	ENSG00000138356(-2.54127522598)	AOX1(-2.54127522598)
ko04924	Renin secretion	4/305	61/7736	0.219223	0.686367	ENSG00000016602(-3.06330694151),ENSG00000142875(-1.58645760792),ENSG00000178372(2.28405698116),ENSG00000169252(-2.27869339667)	CLCA4(-3.06330694151),PRKACB(-1.58645760792),CALML5(2.28405698116),ADRB2(-2.27869339667)
ko04020	Calcium signaling pathway	9/305	171/7736	0.232871	0.719867	ENSG00000050628(-1.94492351554),ENSG00000142875(-1.58645760792),ENSG00000178372(2.28405698116),ENSG00000156049(-2.54527574272),ENSG00000173198(-2.22799210171),ENSG00000136160(-2.05869802385),ENSG00000169252(-2.27869339667),ENSG00000074370(-2.36324168807),ENSG00000141404(-1.76114681841)	PTGER3(-1.94492351554),PRKACB(-1.58645760792),CALML5(2.28405698116),GNA14(-2.54527574272),CYSLTR1(-2.22799210171),EDNRB(-2.05869802385),ADRB2(-2.27869339667),ATP2A3(-2.36324168807),GNAL(-1.76114681841)
ko04512	ECM-receptor interaction	5/305	84/7736	0.23624	0.721152	ENSG00000058085(3.60737768008),ENSG00000118785(3.16038174807),ENSG00000188153(2.5277966654),ENSG00000197565(3.58238531866),ENSG00000196878(2.01060054618)	LAMC2(3.60737768008),SPP1(3.16038174807),COL4A5(2.5277966654),COL4A6(3.58238531866),LAMB3(2.01060054618)
ko04925	Aldosterone synthesis and secretion	5/305	85/7736	0.243624	0.729135	ENSG00000186642(-1.72059149767),ENSG00000142875(-1.58645760792),ENSG00000178372(2.28405698116),ENSG00000147465(3.10530343991),ENSG00000157613(-3.46886489473)	PDE2A(-1.72059149767),PRKACB(-1.58645760792),CALML5(2.28405698116),STAR(3.10530343991),CREB3L1(-3.46886489473)
ko00561	Glycerolipid metabolism	4/305	64/7736	0.244826	0.729135	ENSG00000162407(-1.55382666649),ENSG00000134324(-2.06046481113),ENSG00000177666(-1.07993206484),ENSG00000085662(2.36763359627)	PLPP3(-1.55382666649),LPIN1(-2.06046481113),PNPLA2(-1.07993206484),AKR1B1(2.36763359627)
ko05214	Glioma	4/305	65/7736	0.253507	0.745892	ENSG00000135446(1.57928119232),ENSG00000105810(1.64541072673),ENSG00000178372(2.28405698116),ENSG00000101412(2.26891884404)	CDK4(1.57928119232),CDK6(1.64541072673),CALML5(2.28405698116),E2F1(2.26891884404)
ko05164	Influenza A	13/305	268/7736	0.259081	0.74986	ENSG00000107201(2.70637111339),ENSG00000137033(-3.51656752746),ENSG00000115415(2.41661405209),ENSG00000157601(3.11675940882),ENSG00000134321(5.65782534261),ENSG00000111331(2.83636896276),ENSG00000111335(2.82156917844),ENSG00000169245(3.25972180587),ENSG00000115267(2.17093086577),ENSG00000125538(3.55477624544),ENSG00000169429(5.55269743382),ENSG00000182481(2.0032886256),ENSG00000213928(1.606616509…	DDX58(2.70637111339),IL33(-3.51656752746),STAT1(2.41661405209),MX1(3.11675940882),RSAD2(5.65782534261),OAS3(2.83636896276),OAS2(2.82156917844),CXCL10(3.25972180587),IFIH1(2.17093086577),IL1B(3.55477624544),CXCL8(5.55269743382),KPNA2(2.0032886256),IRF9(1.60661650933)
ko04962	Vasopressin-regulated water reabsorption	3/305	45/7736	0.260996	0.74986	ENSG00000142875(-1.58645760792),ENSG00000165272(-2.49305364353),ENSG00000157613(-3.46886489473)	PRKACB(-1.58645760792),AQP3(-2.49305364353),CREB3L1(-3.46886489473)
ko00280	Valine, leucine and isoleucine degradation	3/305	47/7736	0.282616	0.771118	ENSG00000104951(2.25862710552),ENSG00000138356(-2.54127522598),ENSG00000134240(-7.7571412086)	IL4I1(2.25862710552),AOX1(-2.54127522598),HMGCS2(-7.7571412086)
ko04726	Serotonergic synapse	6/305	113/7736	0.286772	0.771118	ENSG00000069535(-2.67559468043),ENSG00000142875(-1.58645760792),ENSG00000176533(-2.48032893421),ENSG00000073756(3.08279875766),ENSG00000127920(-1.29890712957),ENSG00000179477(5.65764802034)	MAOB(-2.67559468043),PRKACB(-1.58645760792),GNG7(-2.48032893421),PTGS2(3.08279875766),GNG11(-1.29890712957),ALOX12B(5.65764802034)
ko04919	Thyroid hormone signaling pathway	6/305	113/7736	0.286772	0.771118	ENSG00000115415(2.41661405209),ENSG00000114166(-2.27494115887),ENSG00000142875(-1.58645760792),ENSG00000069849(1.96826475113),ENSG00000172348(-2.61087931078),ENSG00000117394(1.72659061611)	STAT1(2.41661405209),KAT2B(-2.27494115887),PRKACB(-1.58645760792),ATP1B3(1.96826475113),RCAN2(-2.61087931078),SLC2A1(1.72659061611)
ko05142	Chagas disease (American trypanosomiasis)	6/305	113/7736	0.286772	0.771118	ENSG00000277632(2.56989808033),ENSG00000125538(3.55477624544),ENSG00000156049(-2.54527574272),ENSG00000169429(5.55269743382),ENSG00000141404(-1.76114681841),ENSG00000170345(-2.48416997805)	CCL3(2.56989808033),IL1B(3.55477624544),GNA14(-2.54527574272),CXCL8(5.55269743382),GNAL(-1.76114681841),FOS(-2.48416997805)
ko04727	GABAergic synapse	5/305	91/7736	0.289074	0.771118	ENSG00000173805(5.07945444709),ENSG00000142875(-1.58645760792),ENSG00000176533(-2.48032893421),ENSG00000094755(-2.9018638644),ENSG00000127920(-1.29890712957)	HAP1(5.07945444709),PRKACB(-1.58645760792),GNG7(-2.48032893421),GABRP(-2.9018638644),GNG11(-1.29890712957)
ko05323	Rheumatoid arthritis	9/305	182/7736	0.290406	0.771118	ENSG00000196611(5.43577490534),ENSG00000105929(-2.74550017858),ENSG00000149968(4.97213632338),ENSG00000277632(2.56989808033),ENSG00000163735(6.7180312493),ENSG00000125538(3.55477624544),ENSG00000169429(5.55269743382),ENSG00000107562(-4.50458837234),ENSG00000170345(-2.48416997805)	MMP1(5.43577490534),ATP6V0A4(-2.74550017858),MMP3(4.97213632338),CCL3(2.56989808033),CXCL5(6.7180312493),IL1B(3.55477624544),CXCL8(5.55269743382),CXCL12(-4.50458837234),FOS(-2.48416997805)
ko04330	Notch signaling pathway	3/305	48/7736	0.293487	0.771118	ENSG00000135144(-1.33959776197),ENSG00000114166(-2.27494115887),ENSG00000184916(2.46413838573)	DTX1(-1.33959776197),KAT2B(-2.27494115887),JAG2(2.46413838573)
ko04114	Oocyte meiosis	6/305	114/7736	0.293656	0.771118	ENSG00000166851(1.86101855387),ENSG00000127564(2.03624887274),ENSG00000142875(-1.58645760792),ENSG00000164109(1.29095866706),ENSG00000178372(2.28405698116),ENSG00000117399(1.72069533456)	PLK1(1.86101855387),PKMYT1(2.03624887274),PRKACB(-1.58645760792),MAD2L1(1.29095866706),CALML5(2.28405698116),CDC20(1.72069533456)
ko04931	Insulin resistance	6/305	116/7736	0.307522	0.791619	ENSG00000131459(-1.67554103378),ENSG00000076555(-1.50705772866),ENSG00000119938(-2.68509733705),ENSG00000130304(-1.57699135456),ENSG00000157613(-3.46886489473),ENSG00000117394(1.72659061611)	GFPT2(-1.67554103378),ACACB(-1.50705772866),PPP1R3C(-2.68509733705),SLC27A1(-1.57699135456),CREB3L1(-3.46886489473),SLC2A1(1.72659061611)
ko04022	cGMP - PKG signaling pathway	8/305	162/7736	0.307947	0.791619	ENSG00000101096(-1.88727649793),ENSG00000186642(-1.72059149767),ENSG00000178372(2.28405698116),ENSG00000136160(-2.05869802385),ENSG00000069849(1.96826475113),ENSG00000169252(-2.27869339667),ENSG00000157613(-3.46886489473),ENSG00000074370(-2.36324168807)	NFATC2(-1.88727649793),PDE2A(-1.72059149767),CALML5(2.28405698116),EDNRB(-2.05869802385),ATP1B3(1.96826475113),ADRB2(-2.27869339667),CREB3L1(-3.46886489473),ATP2A3(-2.36324168807)
ko04914	Progesterone-mediated oocyte maturation	5/305	94/7736	0.312363	0.793149	ENSG00000166851(1.86101855387),ENSG00000127564(2.03624887274),ENSG00000142875(-1.58645760792),ENSG00000164109(1.29095866706),ENSG00000101224(2.50832991134)	PLK1(1.86101855387),PKMYT1(2.03624887274),PRKACB(-1.58645760792),MAD2L1(1.29095866706),CDC25B(2.50832991134)
ko00410	beta-Alanine metabolism	2/305	29/7736	0.317901	0.793149	ENSG00000088826(2.04480641593),ENSG00000131471(-1.85950896828)	SMOX(2.04480641593),AOC3(-1.85950896828)
ko04713	Circadian entrainment	5/305	95/7736	0.320184	0.793149	ENSG00000142875(-1.58645760792),ENSG00000176533(-2.48032893421),ENSG00000178372(2.28405698116),ENSG00000127920(-1.29890712957),ENSG00000170345(-2.48416997805)	PRKACB(-1.58645760792),GNG7(-2.48032893421),CALML5(2.28405698116),GNG11(-1.29890712957),FOS(-2.48416997805)
ko00600	Sphingolipid metabolism	3/305	51/7736	0.326223	0.793149	ENSG00000174607(2.51609825728),ENSG00000162407(-1.55382666649),ENSG00000168350(-2.45498048038)	UGT8(2.51609825728),PLPP3(-1.55382666649),DEGS2(-2.45498048038)
ko05030	Cocaine addiction	3/305	51/7736	0.326223	0.793149	ENSG00000069535(-2.67559468043),ENSG00000142875(-1.58645760792),ENSG00000157613(-3.46886489473)	MAOB(-2.67559468043),PRKACB(-1.58645760792),CREB3L1(-3.46886489473)
ko05032	Morphine addiction	5/305	96/7736	0.328029	0.793149	ENSG00000186642(-1.72059149767),ENSG00000142875(-1.58645760792),ENSG00000176533(-2.48032893421),ENSG00000094755(-2.9018638644),ENSG00000127920(-1.29890712957)	PDE2A(-1.72059149767),PRKACB(-1.58645760792),GNG7(-2.48032893421),GABRP(-2.9018638644),GNG11(-1.29890712957)
ko04922	Glucagon signaling pathway	5/305	99/7736	0.351667	0.841967	ENSG00000142875(-1.58645760792),ENSG00000178372(2.28405698116),ENSG00000076555(-1.50705772866),ENSG00000157613(-3.46886489473),ENSG00000117394(1.72659061611)	PRKACB(-1.58645760792),CALML5(2.28405698116),ACACB(-1.50705772866),CREB3L1(-3.46886489473),SLC2A1(1.72659061611)
ko00072	Synthesis and degradation of ketone bodies	1/305	7736-11-01	0.357738	0.844332	ENSG00000134240(-7.7571412086)	HMGCS2(-7.7571412086)
ko04723	Retrograde endocannabinoid signaling	5/305	100/7736	0.359569	0.844332	ENSG00000142875(-1.58645760792),ENSG00000176533(-2.48032893421),ENSG00000094755(-2.9018638644),ENSG00000073756(3.08279875766),ENSG00000127920(-1.29890712957)	PRKACB(-1.58645760792),GNG7(-2.48032893421),GABRP(-2.9018638644),PTGS2(3.08279875766),GNG11(-1.29890712957)
ko05217	Basal cell carcinoma	3/305	55/7736	0.369822	0.85789	ENSG00000074047(2.53240919732),ENSG00000188064(2.29636644288),ENSG00000164930(1.43789101887)	GLI2(2.53240919732),WNT7B(2.29636644288),FZD6(1.43789101887)
ko00240	Pyrimidine metabolism	5/305	102/7736	0.375388	0.85789	ENSG00000134326(4.65875236262),ENSG00000167900(2.44271517601),ENSG00000155085(-2.22166474453),ENSG00000138035(1.71591817639),ENSG00000025708(2.90776987846)	CMPK2(4.65875236262),TK1(2.44271517601),AK9(-2.22166474453),PNPT1(1.71591817639),TYMP(2.90776987846)
ko00051	Fructose and mannose metabolism	2/305	33/7736	0.375882	0.85789	ENSG00000112699(-2.34326346933),ENSG00000085662(2.36763359627)	GMDS(-2.34326346933),AKR1B1(2.36763359627)
ko00250	Alanine, aspartate and glutamate metabolism	2/305	34/7736	0.390077	0.882046	ENSG00000131459(-1.67554103378),ENSG00000104951(2.25862710552)	GFPT2(-1.67554103378),IL4I1(2.25862710552)
ko02010	ABC transporters	3/305	59/7736	0.412895	0.921833	ENSG00000154262(-2.91399087638),ENSG00000154263(-2.60818253977),ENSG00000141338(-2.86352799201)	ABCA6(-2.91399087638),ABCA10(-2.60818253977),ABCA8(-2.86352799201)
ko05203	Viral carcinogenesis	11/305	254/7736	0.418693	0.921833	ENSG00000135446(1.57928119232),ENSG00000118971(2.2816161225),ENSG00000114166(-2.27494115887),ENSG00000142875(-1.58645760792),ENSG00000006747(-2.5055006515),ENSG00000105810(1.64541072673),ENSG00000145604(1.60497964918),ENSG00000213928(1.60661650933),ENSG00000149554(2.08558929488),ENSG00000157613(-3.46886489473),ENSG00000117399(1.72069533456)	CDK4(1.57928119232),CCND2(2.2816161225),KAT2B(-2.27494115887),PRKACB(-1.58645760792),SCIN(-2.5055006515),CDK6(1.64541072673),SKP2(1.60497964918),IRF9(1.60661650933),CHEK1(2.08558929488),CREB3L1(-3.46886489473),CDC20(1.72069533456)
ko04014	Ras signaling pathway	10/305	231/7736	0.427142	0.921833	ENSG00000037280(-1.82626495613),ENSG00000140285(-2.56956441411),ENSG00000161958(2.06942181785),ENSG00000142875(-1.58645760792),ENSG00000176533(-2.48032893421),ENSG00000178372(2.28405698116),ENSG00000068831(-2.23413888574),ENSG00000127920(-1.29890712957),ENSG00000105122(-1.50195301272),ENSG00000150630(-1.76867721662)	FLT4(-1.82626495613),FGF7(-2.56956441411),FGF11(2.06942181785),PRKACB(-1.58645760792),GNG7(-2.48032893421),CALML5(2.28405698116),RASGRP2(-2.23413888574),GNG11(-1.29890712957),RASAL3(-1.50195301272),VEGFC(-1.76867721662)
ko00061	Fatty acid biosynthesis	1/305	14/7736	0.430857	0.921833	ENSG00000076555(-1.50705772866)	ACACB(-1.50705772866)
ko04626	Plant-pathogen interaction	1/305	14/7736	0.430857	0.921833	ENSG00000178372(2.28405698116)	CALML5(2.28405698116)
ko04960	Aldosterone-regulated sodium reabsorption	2/305	37/7736	0.431751	0.921833	ENSG00000168447(-2.17608205216),ENSG00000069849(1.96826475113)	SCNN1B(-2.17608205216),ATP1B3(1.96826475113)
ko05223	Non-small cell lung cancer	3/305	61/7736	0.434096	0.921833	ENSG00000135446(1.57928119232),ENSG00000105810(1.64541072673),ENSG00000101412(2.26891884404)	CDK4(1.57928119232),CDK6(1.64541072673),E2F1(2.26891884404)
ko04725	Cholinergic synapse	5/305	110/7736	0.438391	0.922037	ENSG00000142875(-1.58645760792),ENSG00000176533(-2.48032893421),ENSG00000127920(-1.29890712957),ENSG00000157613(-3.46886489473),ENSG00000170345(-2.48416997805)	PRKACB(-1.58645760792),GNG7(-2.48032893421),GNG11(-1.29890712957),CREB3L1(-3.46886489473),FOS(-2.48416997805)
ko03008	Ribosome biogenesis in eukaryotes	4/305	86/7736	0.441743	0.922037	ENSG00000104356(2.10560742274),ENSG00000101361(1.78951408149),ENSG00000107937(1.52040773199),ENSG00000119285(1.51368089838)	POP1(2.10560742274),NOP56(1.78951408149),GTPBP4(1.52040773199),HEATR1(1.51368089838)
ko04360	Axon guidance	7/305	165/7736	0.476712	0.935667	ENSG00000101096(-1.88727649793),ENSG00000074527(-1.64910397422),ENSG00000173210(-2.9665090736),ENSG00000184347(-2.45225246663),ENSG00000144857(-1.48774490914),ENSG00000090776(1.69264329813),ENSG00000107562(-4.50458837234)	NFATC2(-1.88727649793),NTN4(-1.64910397422),ABLIM3(-2.9665090736),SLIT3(-2.45225246663),BOC(-1.48774490914),EFNB1(1.69264329813),CXCL12(-4.50458837234)
ko04750	Inflammatory mediator regulation of TRP channels	4/305	92/7736	0.493976	0.935667	ENSG00000142875(-1.58645760792),ENSG00000167723(3.28172356947),ENSG00000125538(3.55477624544),ENSG00000178372(2.28405698116)	PRKACB(-1.58645760792),TRPV3(3.28172356947),IL1B(3.55477624544),CALML5(2.28405698116)
ko00604	Glycosphingolipid biosynthesis - ganglio series	1/305	17/7736	0.495676	0.935667	ENSG00000135454(3.03858875509)	B4GALNT1(3.03858875509)
ko00910	Nitrogen metabolism	1/305	17/7736	0.495676	0.935667	ENSG00000107159(7.80563905408)	CA9(7.80563905408)
ko04510	Focal adhesion	8/305	195/7736	0.505939	0.935667	ENSG00000037280(-1.82626495613),ENSG00000058085(3.60737768008),ENSG00000118785(3.16038174807),ENSG00000118971(2.2816161225),ENSG00000188153(2.5277966654),ENSG00000197565(3.58238531866),ENSG00000196878(2.01060054618),ENSG00000150630(-1.76867721662)	FLT4(-1.82626495613),LAMC2(3.60737768008),SPP1(3.16038174807),CCND2(2.2816161225),COL4A5(2.5277966654),COL4A6(3.58238531866),LAMB3(2.01060054618),VEGFC(-1.76867721662)
ko05134	Legionellosis	3/305	69/7736	0.515651	0.935667	ENSG00000163739(2.63012975243),ENSG00000125538(3.55477624544),ENSG00000169429(5.55269743382)	CXCL1(2.63012975243),IL1B(3.55477624544),CXCL8(5.55269743382)
ko04261	Adrenergic signaling in cardiomyocytes	6/305	146/7736	0.518109	0.935667	ENSG00000142875(-1.58645760792),ENSG00000178372(2.28405698116),ENSG00000129991(3.304869314),ENSG00000069849(1.96826475113),ENSG00000169252(-2.27869339667),ENSG00000157613(-3.46886489473)	PRKACB(-1.58645760792),CALML5(2.28405698116),TNNI3(3.304869314),ATP1B3(1.96826475113),ADRB2(-2.27869339667),CREB3L1(-3.46886489473)
ko04550	Signaling pathways regulating pluripotency of stem cells	6/305	146/7736	0.518109	0.935667	ENSG00000143995(-1.21540012993),ENSG00000105880(3.1121663992),ENSG00000188064(2.29636644288),ENSG00000130829(3.12754674629),ENSG00000113594(-2.36224572694),ENSG00000164930(1.43789101887)	MEIS1(-1.21540012993),DLX5(3.1121663992),WNT7B(2.29636644288),DUSP9(3.12754674629),LIFR(-2.36224572694),FZD6(1.43789101887)
ko05166	HTLV-I infection	15/305	377/7736	0.524291	0.935667	ENSG00000101096(-1.88727649793),ENSG00000135446(1.57928119232),ENSG00000118971(2.2816161225),ENSG00000114166(-2.27494115887),ENSG00000142875(-1.58645760792),ENSG00000175592(2.59958275392),ENSG00000164109(1.29095866706),ENSG00000188064(2.29636644288),ENSG00000101057(2.52032092057),ENSG00000164930(1.43789101887),ENSG00000101412(2.26891884404),ENSG00000149554(2.08558929488),ENSG00000117394(1.7265906…	NFATC2(-1.88727649793),CDK4(1.57928119232),CCND2(2.2816161225),KAT2B(-2.27494115887),PRKACB(-1.58645760792),FOSL1(2.59958275392),MAD2L1(1.29095866706),WNT7B(2.29636644288),MYBL2(2.52032092057),FZD6(1.43789101887),E2F1(2.26891884404),CHEK1(2.08558929488),SLC2A1(1.72659061611),CDC20(1.72069533456),FOS(-2.48416997805)
ko00100	Steroid biosynthesis	1/305	19/7736	0.534746	0.935667	ENSG00000170271(-1.77146961295)	FAXDC2(-1.77146961295)
ko05220	Chronic myeloid leukemia	3/305	71/7736	0.535057	0.935667	ENSG00000135446(1.57928119232),ENSG00000105810(1.64541072673),ENSG00000101412(2.26891884404)	CDK4(1.57928119232),CDK6(1.64541072673),E2F1(2.26891884404)
ko04910	Insulin signaling pathway	6/305	149/7736	0.5382	0.935667	ENSG00000095637(-1.95479026606),ENSG00000005249(-2.10562498811),ENSG00000142875(-1.58645760792),ENSG00000178372(2.28405698116),ENSG00000076555(-1.50705772866),ENSG00000119938(-2.68509733705)	SORBS1(-1.95479026606),PRKAR2B(-2.10562498811),PRKACB(-1.58645760792),CALML5(2.28405698116),ACACB(-1.50705772866),PPP1R3C(-2.68509733705)
ko04976	Bile secretion	3/305	72/7736	0.544594	0.935667	ENSG00000142875(-1.58645760792),ENSG00000069849(1.96826475113),ENSG00000117394(1.72659061611)	PRKACB(-1.58645760792),ATP1B3(1.96826475113),SLC2A1(1.72659061611)
ko04973	Carbohydrate digestion and absorption	2/305	46/7736	0.546736	0.935667	ENSG00000069849(1.96826475113),ENSG00000240038(-2.08304735547)	ATP1B3(1.96826475113),AMY2B(-2.08304735547)
ko00670	One carbon pool by folate	1/305	20/7736	0.553134	0.935667	ENSG00000144908(-4.18966521837)	ALDH1L1(-4.18966521837)
ko04918	Thyroid hormone synthesis	3/305	73/7736	0.554017	0.935667	ENSG00000142875(-1.58645760792),ENSG00000069849(1.96826475113),ENSG00000157613(-3.46886489473)	PRKACB(-1.58645760792),ATP1B3(1.96826475113),CREB3L1(-3.46886489473)
ko04068	FoxO signaling pathway	5/305	126/7736	0.558636	0.935667	ENSG00000166851(1.86101855387),ENSG00000118971(2.2816161225),ENSG00000170989(-1.39752317611),ENSG00000145604(1.60497964918),ENSG00000127528(-2.29932817226)	PLK1(1.86101855387),CCND2(2.2816161225),S1PR1(-1.39752317611),SKP2(1.60497964918),KLF2(-2.29932817226)
ko04917	Prolactin signaling pathway	3/305	74/7736	0.563324	0.935667	ENSG00000115415(2.41661405209),ENSG00000118971(2.2816161225),ENSG00000170345(-2.48416997805)	STAT1(2.41661405209),CCND2(2.2816161225),FOS(-2.48416997805)
ko04971	Gastric acid secretion	3/305	74/7736	0.563324	0.935667	ENSG00000142875(-1.58645760792),ENSG00000178372(2.28405698116),ENSG00000069849(1.96826475113)	PRKACB(-1.58645760792),CALML5(2.28405698116),ATP1B3(1.96826475113)
ko05205	Proteoglycans in cancer	8/305	205/7736	0.563465	0.935667	ENSG00000100234(-1.95004596221),ENSG00000166225(1.23322934302),ENSG00000142875(-1.58645760792),ENSG00000188064(2.29636644288),ENSG00000128710(2.44760136919),ENSG00000011465(-1.39116160263),ENSG00000145362(-2.43159207875),ENSG00000164930(1.43789101887)	TIMP3(-1.95004596221),FRS2(1.23322934302),PRKACB(-1.58645760792),WNT7B(2.29636644288),HOXD10(2.44760136919),DCN(-1.39116160263),ANK2(-2.43159207875),FZD6(1.43789101887)
ko00520	Amino sugar and nucleotide sugar metabolism	2/305	48/7736	0.569996	0.935667	ENSG00000131459(-1.67554103378),ENSG00000112699(-2.34326346933)	GFPT2(-1.67554103378),GMDS(-2.34326346933)
ko00900	Terpenoid backbone biosynthesis	1/305	21/7736	0.570798	0.935667	ENSG00000134240(-7.7571412086)	HMGCS2(-7.7571412086)
ko04380	Osteoclast differentiation	7/305	181/7736	0.575648	0.935667	ENSG00000101096(-1.88727649793),ENSG00000115415(2.41661405209),ENSG00000175592(2.59958275392),ENSG00000125538(3.55477624544),ENSG00000213928(1.60661650933),ENSG00000116701(1.95084718703),ENSG00000170345(-2.48416997805)	NFATC2(-1.88727649793),STAT1(2.41661405209),FOSL1(2.59958275392),IL1B(3.55477624544),IRF9(1.60661650933),NCF2(1.95084718703),FOS(-2.48416997805)
ko04015	Rap1 signaling pathway	8/305	208/7736	0.580162	0.935667	ENSG00000037280(-1.82626495613),ENSG00000140285(-2.56956441411),ENSG00000161958(2.06942181785),ENSG00000070087(3.17645113454),ENSG00000178372(2.28405698116),ENSG00000068831(-2.23413888574),ENSG00000141293(-1.40017551515),ENSG00000150630(-1.76867721662)	FLT4(-1.82626495613),FGF7(-2.56956441411),FGF11(2.06942181785),PFN2(3.17645113454),CALML5(2.28405698116),RASGRP2(-2.23413888574),SKAP1(-1.40017551515),VEGFC(-1.76867721662)
ko04978	Mineral absorption	2/305	49/7736	0.581298	0.935667	ENSG00000205364(-2.30899568642),ENSG00000069849(1.96826475113)	MT1M(-2.30899568642),ATP1B3(1.96826475113)
ko04260	Cardiac muscle contraction	3/305	76/7736	0.58158	0.935667	ENSG00000161281(-1.91318622869),ENSG00000129991(3.304869314),ENSG00000069849(1.96826475113)	COX7A1(-1.91318622869),TNNI3(3.304869314),ATP1B3(1.96826475113)
ko05120	Epithelial cell signaling in Helicobacter pylori infection	3/305	77/7736	0.590526	0.935667	ENSG00000105929(-2.74550017858),ENSG00000169429(5.55269743382),ENSG00000154721(-2.13502696899)	ATP6V0A4(-2.74550017858),CXCL8(5.55269743382),JAM2(-2.13502696899)
ko00480	Glutathione metabolism	2/305	50/7736	0.592381	0.935667	ENSG00000243955(-5.8211453057),ENSG00000115758(2.63573404818)	GSTA1(-5.8211453057),ODC1(2.63573404818)
ko00510	N-Glycan biosynthesis	2/305	50/7736	0.592381	0.935667	ENSG00000111885(-1.84476060244),ENSG00000117643(-1.81500632797)	MAN1A1(-1.84476060244),MAN1C1(-1.81500632797)
ko04614	Renin-angiotensin system	1/305	23/7736	0.604065	0.935667	ENSG00000167748(2.56312241282)	KLK1(2.56312241282)
ko04964	Proximal tubule bicarbonate reclamation	1/305	23/7736	0.604065	0.935667	ENSG00000069849(1.96826475113)	ATP1B3(1.96826475113)
ko05012	Parkinson's disease	6/305	160/7736	0.608518	0.935667	ENSG00000185633(1.86365929887),ENSG00000161281(-1.91318622869),ENSG00000142875(-1.58645760792),ENSG00000154277(2.08479899889),ENSG00000156587(2.12357960707),ENSG00000141404(-1.76114681841)	NDUFA4L2(1.86365929887),COX7A1(-1.91318622869),PRKACB(-1.58645760792),UCHL1(2.08479899889),UBE2L6(2.12357960707),GNAL(-1.76114681841)
ko05231	Choline metabolism in cancer	4/305	107/7736	0.614093	0.935667	ENSG00000146477(-3.43659591382),ENSG00000162407(-1.55382666649),ENSG00000111666(-1.69821468119),ENSG00000170345(-2.48416997805)	SLC22A3(-3.43659591382),PLPP3(-1.55382666649),CHPT1(-1.69821468119),FOS(-2.48416997805)
ko00534	Glycosaminoglycan biosynthesis - heparan sulfate / heparin	1/305	24/7736	0.619721	0.935667	ENSG00000182197(1.66402791345)	EXT1(1.66402791345)
ko03430	Mismatch repair	1/305	24/7736	0.619721	0.935667	ENSG00000174371(2.27759325879)	EXO1(2.27759325879)
ko04120	Ubiquitin mediated proteolysis	5/305	137/7736	0.633409	0.935667	ENSG00000175063(1.97833892304),ENSG00000145604(1.60497964918),ENSG00000108106(1.74970594249),ENSG00000156587(2.12357960707),ENSG00000117399(1.72069533456)	UBE2C(1.97833892304),SKP2(1.60497964918),UBE2S(1.74970594249),UBE2L6(2.12357960707),CDC20(1.72069533456)
ko04920	Adipocytokine signaling pathway	3/305	83/7736	0.641566	0.935667	ENSG00000116678(-3.08075332626),ENSG00000076555(-1.50705772866),ENSG00000117394(1.72659061611)	LEPR(-3.08075332626),ACACB(-1.50705772866),SLC2A1(1.72659061611)
ko05010	Alzheimer's disease	7/305	194/7736	0.64903	0.935667	ENSG00000185633(1.86365929887),ENSG00000161281(-1.91318622869),ENSG00000015475(2.08689841431),ENSG00000125538(3.55477624544),ENSG00000178372(2.28405698116),ENSG00000166313(-1.56869299385),ENSG00000074370(-2.36324168807)	NDUFA4L2(1.86365929887),COX7A1(-1.91318622869),BID(2.08689841431),IL1B(3.55477624544),CALML5(2.28405698116),APBB1(-1.56869299385),ATP2A3(-2.36324168807)
ko00053	Ascorbate and aldarate metabolism	1/305	26/7736	0.649208	0.935667	ENSG00000240224(-5.37378985467)	UGT1A5(-5.37378985467)
ko04150	mTOR signaling pathway	6/305	169/7736	0.661439	0.935667	ENSG00000102547(-2.59289684917),ENSG00000188064(2.29636644288),ENSG00000145604(1.60497964918),ENSG00000168003(1.90443894745),ENSG00000025039(-2.05114351866),ENSG00000164930(1.43789101887)	CAB39L(-2.59289684917),WNT7B(2.29636644288),SKP2(1.60497964918),SLC3A2(1.90443894745),RRAGD(-2.05114351866),FZD6(1.43789101887)
ko05202	Transcriptional misregulation in cancers	6/305	169/7736	0.661439	0.935667	ENSG00000143995(-1.21540012993),ENSG00000149968(4.97213632338),ENSG00000118971(2.2816161225),ENSG00000005381(-6.57302653166),ENSG00000169429(5.55269743382),ENSG00000149948(4.13039604035)	MEIS1(-1.21540012993),MMP3(4.97213632338),CCND2(2.2816161225),MPO(-6.57302653166),CXCL8(5.55269743382),HMGA2(4.13039604035)
ko04370	VEGF signaling pathway	2/305	57/7736	0.663838	0.935667	ENSG00000101096(-1.88727649793),ENSG00000073756(3.08279875766)	NFATC2(-1.88727649793),PTGS2(3.08279875766)
ko05414	Dilated cardiomyopathy (DCM)	3/305	86/7736	0.665355	0.935667	ENSG00000142875(-1.58645760792),ENSG00000129991(3.304869314),ENSG00000175084(-3.20663968422)	PRKACB(-1.58645760792),TNNI3(3.304869314),DES(-3.20663968422)
ko00630	Glyoxylate and dicarboxylate metabolism	1/305	28/7736	0.676414	0.935667	ENSG00000178445(4.48963948504)	GLDC(4.48963948504)
ko04010	MAPK signaling pathway	10/305	281/7736	0.676567	0.935667	ENSG00000140285(-2.56956441411),ENSG00000164086(1.49308517445),ENSG00000161958(2.06942181785),ENSG00000185652(-3.00709818374),ENSG00000142875(-1.58645760792),ENSG00000101224(2.50832991134),ENSG00000125538(3.55477624544),ENSG00000130829(3.12754674629),ENSG00000068831(-2.23413888574),ENSG00000170345(-2.48416997805)	FGF7(-2.56956441411),DUSP7(1.49308517445),FGF11(2.06942181785),NTF3(-3.00709818374),PRKACB(-1.58645760792),CDC25B(2.50832991134),IL1B(3.55477624544),DUSP9(3.12754674629),RASGRP2(-2.23413888574),FOS(-2.48416997805)
ko05110	Vibrio cholerae infection	2/305	59/7736	0.682315	0.935667	ENSG00000105929(-2.74550017858),ENSG00000142875(-1.58645760792)	ATP6V0A4(-2.74550017858),PRKACB(-1.58645760792)
ko05140	Leishmaniasis	5/305	145/7736	0.682672	0.935667	ENSG00000115415(2.41661405209),ENSG00000125538(3.55477624544),ENSG00000073756(3.08279875766),ENSG00000116701(1.95084718703),ENSG00000170345(-2.48416997805)	STAT1(2.41661405209),IL1B(3.55477624544),PTGS2(3.08279875766),NCF2(1.95084718703),FOS(-2.48416997805)
ko00512	Mucin type O-glycan biosynthesis	1/305	29/7736	0.689218	0.935667	ENSG00000119514(-1.56947002826)	GALNT12(-1.56947002826)
ko00650	Butanoate metabolism	1/305	29/7736	0.689218	0.935667	ENSG00000134240(-7.7571412086)	HMGCS2(-7.7571412086)
ko00760	Nicotinate and nicotinamide metabolism	1/305	29/7736	0.689218	0.935667	ENSG00000138356(-2.54127522598)	AOX1(-2.54127522598)
ko04745	Phototransduction - fly	1/305	29/7736	0.689218	0.935667	ENSG00000178372(2.28405698116)	CALML5(2.28405698116)
ko00500	Starch and sucrose metabolism	2/305	60/7736	0.691239	0.935667	ENSG00000240224(-5.37378985467),ENSG00000240038(-2.08304735547)	UGT1A5(-5.37378985467),AMY2B(-2.08304735547)
ko04932	Non-alcoholic fatty liver disease (NAFLD)	6/305	175/7736	0.694146	0.935667	ENSG00000185633(1.86365929887),ENSG00000161281(-1.91318622869),ENSG00000116678(-3.08075332626),ENSG00000015475(2.08689841431),ENSG00000125538(3.55477624544),ENSG00000169429(5.55269743382)	NDUFA4L2(1.86365929887),COX7A1(-1.91318622869),LEPR(-3.08075332626),BID(2.08689841431),IL1B(3.55477624544),CXCL8(5.55269743382)
ko04915	Estrogen signaling pathway	4/305	119/7736	0.696432	0.935667	ENSG00000142875(-1.58645760792),ENSG00000178372(2.28405698116),ENSG00000157613(-3.46886489473),ENSG00000170345(-2.48416997805)	PRKACB(-1.58645760792),CALML5(2.28405698116),CREB3L1(-3.46886489473),FOS(-2.48416997805)
ko04744	Phototransduction	1/305	30/7736	0.701517	0.935667	ENSG00000178372(2.28405698116)	CALML5(2.28405698116)
ko04921	Oxytocin signaling pathway	5/305	150/7736	0.71112	0.935667	ENSG00000101096(-1.88727649793),ENSG00000142875(-1.58645760792),ENSG00000178372(2.28405698116),ENSG00000073756(3.08279875766),ENSG00000170345(-2.48416997805)	NFATC2(-1.88727649793),PRKACB(-1.58645760792),CALML5(2.28405698116),PTGS2(3.08279875766),FOS(-2.48416997805)
ko03410	Base excision repair	1/305	31/7736	0.713331	0.935667	ENSG00000168496(2.27486738339)	FEN1(2.27486738339)
ko04215	Apoptosis - multiple species	1/305	31/7736	0.713331	0.935667	ENSG00000015475(2.08689841431)	BID(2.08689841431)
ko04722	Neurotrophin signaling pathway	4/305	123/7736	0.720918	0.935667	ENSG00000134243(-1.79455418383),ENSG00000185652(-3.00709818374),ENSG00000166225(1.23322934302),ENSG00000178372(2.28405698116)	SORT1(-1.79455418383),NTF3(-3.00709818374),FRS2(1.23322934302),CALML5(2.28405698116)
ko03018	RNA degradation	3/305	94/7736	0.723113	0.935667	ENSG00000154640(2.06206200909),ENSG00000178896(1.64729175321),ENSG00000138035(1.71591817639)	BTG3(2.06206200909),EXOSC4(1.64729175321),PNPT1(1.71591817639)
ko00640	Propanoate metabolism	1/305	32/7736	0.724679	0.935667	ENSG00000076555(-1.50705772866)	ACACB(-1.50705772866)
ko04341	Hedgehog signaling pathway - Fly	1/305	32/7736	0.724679	0.935667	ENSG00000142875(-1.58645760792)	PRKACB(-1.58645760792)
ko05131	Shigellosis	2/305	64/7736	0.724889	0.935667	ENSG00000070087(3.17645113454),ENSG00000169429(5.55269743382)	PFN2(3.17645113454),CXCL8(5.55269743382)
ko04720	Long-term potentiation	2/305	65/7736	0.732802	0.935667	ENSG00000142875(-1.58645760792),ENSG00000178372(2.28405698116)	PRKACB(-1.58645760792),CALML5(2.28405698116)
ko00052	Galactose metabolism	1/305	33/7736	0.735579	0.935667	ENSG00000085662(2.36763359627)	AKR1B1(2.36763359627)
ko04972	Pancreatic secretion	3/305	96/7736	0.736278	0.935667	ENSG00000016602(-3.06330694151),ENSG00000069849(1.96826475113),ENSG00000074370(-2.36324168807)	CLCA4(-3.06330694151),ATP1B3(1.96826475113),ATP2A3(-2.36324168807)
ko04621	NOD-like receptor signaling pathway	2/305	66/7736	0.740523	0.935667	ENSG00000125538(3.55477624544),ENSG00000169429(5.55269743382)	IL1B(3.55477624544),CXCL8(5.55269743382)
ko04211	Longevity regulating pathway - mammal	3/305	98/7736	0.748945	0.935667	ENSG00000142875(-1.58645760792),ENSG00000080546(-1.06777448027),ENSG00000157613(-3.46886489473)	PRKACB(-1.58645760792),SESN1(-1.06777448027),CREB3L1(-3.46886489473)
ko04071	Sphingolipid signaling pathway	4/305	128/7736	0.749439	0.935667	ENSG00000170989(-1.39752317611),ENSG00000015475(2.08689841431),ENSG00000168350(-2.45498048038),ENSG00000179639(-3.54653205369)	S1PR1(-1.39752317611),BID(2.08689841431),DEGS2(-2.45498048038),FCER1A(-3.54653205369)
ko04966	Collecting duct acid secretion	1/305	35/7736	0.756105	0.935667	ENSG00000105929(-2.74550017858)	ATP6V0A4(-2.74550017858)
ko04391	Hippo signaling pathway -fly	2/305	70/7736	0.769525	0.935667	ENSG00000142599(-1.09458805245),ENSG00000271601(-1.68865118501)	RERE(-1.09458805245),LIX1L(-1.68865118501)
ko04080	Neuroactive ligand-receptor interaction	10/305	309/7736	0.783916	0.935667	ENSG00000050628(-1.94492351554),ENSG00000116678(-3.08075332626),ENSG00000164128(-5.94554777833),ENSG00000171388(4.01341687019),ENSG00000170989(-1.39752317611),ENSG00000094755(-2.9018638644),ENSG00000197696(2.48590746458),ENSG00000173198(-2.22799210171),ENSG00000136160(-2.05869802385),ENSG00000169252(-2.27869339667)	PTGER3(-1.94492351554),LEPR(-3.08075332626),NPY1R(-5.94554777833),APLN(4.01341687019),S1PR1(-1.39752317611),GABRP(-2.9018638644),NMB(2.48590746458),CYSLTR1(-2.22799210171),EDNRB(-2.05869802385),ADRB2(-2.27869339667)
ko05033	Nicotine addiction	1/305	38/7736	0.783955	0.935667	ENSG00000094755(-2.9018638644)	GABRP(-2.9018638644)
ko04514	Cell adhesion molecules (CAMs)	8/305	253/7736	0.787381	0.935667	ENSG00000165215(-2.59024682993),ENSG00000012124(-1.78535693083),ENSG00000013297(-2.84754831402),ENSG00000158887(-4.28695579753),ENSG00000171217(4.77376456154),ENSG00000134873(-8.32343151422),ENSG00000253958(-2.83424274172),ENSG00000154721(-2.13502696899)	CLDN3(-2.59024682993),CD22(-1.78535693083),CLDN11(-2.84754831402),MPZ(-4.28695579753),CLDN20(4.77376456154),CLDN10(-8.32343151422),CLDN23(-2.83424274172),JAM2(-2.13502696899)
ko01524	Platinum drug resistance	2/305	73/7736	0.78939	0.935667	ENSG00000243955(-5.8211453057),ENSG00000015475(2.08689841431)	GSTA1(-5.8211453057),BID(2.08689841431)
ko04624	Toll and Imd signaling pathway	1/305	39/7736	0.792514	0.935667	ENSG00000145362(-2.43159207875)	ANK2(-2.43159207875)
ko04975	Fat digestion and absorption	1/305	39/7736	0.792514	0.935667	ENSG00000162407(-1.55382666649)	PLPP3(-1.55382666649)
ko00564	Glycerophospholipid metabolism	3/305	107/7736	0.800022	0.935667	ENSG00000162407(-1.55382666649),ENSG00000134324(-2.06046481113),ENSG00000111666(-1.69821468119)	PLPP3(-1.55382666649),LPIN1(-2.06046481113),CHPT1(-1.69821468119)
ko00620	Pyruvate metabolism	1/305	40/7736	0.800736	0.935667	ENSG00000076555(-1.50705772866)	ACACB(-1.50705772866)
ko04724	Glutamatergic synapse	3/305	110/7736	0.815001	0.935667	ENSG00000142875(-1.58645760792),ENSG00000176533(-2.48032893421),ENSG00000127920(-1.29890712957)	PRKACB(-1.58645760792),GNG7(-2.48032893421),GNG11(-1.29890712957)
ko00071	Fatty acid degradation	1/305	43/7736	0.823504	0.935667	ENSG00000196616(-6.5653559564)	ADH1B(-6.5653559564)
ko00860	Porphyrin and chlorophyll metabolism	1/305	43/7736	0.823504	0.935667	ENSG00000240224(-5.37378985467)	UGT1A5(-5.37378985467)
ko04660	T cell receptor signaling pathway	3/305	114/7736	0.833488	0.935667	ENSG00000101096(-1.88727649793),ENSG00000135446(1.57928119232),ENSG00000170345(-2.48416997805)	NFATC2(-1.88727649793),CDK4(1.57928119232),FOS(-2.48416997805)
ko00230	Purine metabolism	5/305	177/7736	0.833645	0.935667	ENSG00000001561(-2.81971872523),ENSG00000186642(-1.72059149767),ENSG00000165704(1.86288127787),ENSG00000155085(-2.22166474453),ENSG00000138035(1.71591817639)	ENPP4(-2.81971872523),PDE2A(-1.72059149767),HPRT1(1.86288127787),AK9(-2.22166474453),PNPT1(1.71591817639)
ko04013	MAPK signaling pathway - fly	2/305	81/7736	0.835169	0.935667	ENSG00000070087(3.17645113454),ENSG00000136158(-1.56172052691)	PFN2(3.17645113454),SPRY2(-1.56172052691)
ko04390	Hippo signaling pathway	4/305	147/7736	0.837725	0.935667	ENSG00000074047(2.53240919732),ENSG00000118971(2.2816161225),ENSG00000188064(2.29636644288),ENSG00000164930(1.43789101887)	GLI2(2.53240919732),CCND2(2.2816161225),WNT7B(2.29636644288),FZD6(1.43789101887)
ko00270	Cysteine and methionine metabolism	1/305	46/7736	0.843677	0.935667	ENSG00000104951(2.25862710552)	IL4I1(2.25862710552)
ko05340	Primary immunodeficiency	1/305	46/7736	0.843677	0.935667	ENSG00000177455(-2.62379346353)	CD19(-2.62379346353)
ko05034	Alcoholism	5/305	180/7736	0.844204	0.935667	ENSG00000069535(-2.67559468043),ENSG00000176533(-2.48032893421),ENSG00000178372(2.28405698116),ENSG00000127920(-1.29890712957),ENSG00000157613(-3.46886489473)	MAOB(-2.67559468043),GNG7(-2.48032893421),CALML5(2.28405698116),GNG11(-1.29890712957),CREB3L1(-3.46886489473)
ko05410	Hypertrophic cardiomyopathy (HCM)	2/305	83/7736	0.845119	0.935667	ENSG00000129991(3.304869314),ENSG00000175084(-3.20663968422)	TNNI3(3.304869314),DES(-3.20663968422)
ko05168	Herpes simplex infection	10/305	331/7736	0.848415	0.935667	ENSG00000107201(2.70637111339),ENSG00000115415(2.41661405209),ENSG00000111331(2.83636896276),ENSG00000111335(2.82156917844),ENSG00000115267(2.17093086577),ENSG00000125538(3.55477624544),ENSG00000145604(1.60497964918),ENSG00000213928(1.60661650933),ENSG00000185745(5.00359198649),ENSG00000170345(-2.48416997805)	DDX58(2.70637111339),STAT1(2.41661405209),OAS3(2.83636896276),OAS2(2.82156917844),IFIH1(2.17093086577),IL1B(3.55477624544),SKP2(1.60497964918),IRF9(1.60661650933),IFIT1(5.00359198649),FOS(-2.48416997805)
ko04666	Fc gamma R-mediated phagocytosis	2/305	85/7736	0.854521	0.935667	ENSG00000162407(-1.55382666649),ENSG00000006747(-2.5055006515)	PLPP3(-1.55382666649),SCIN(-2.5055006515)
ko05215	Prostate cancer	2/305	85/7736	0.854521	0.935667	ENSG00000101412(2.26891884404),ENSG00000157613(-3.46886489473)	E2F1(2.26891884404),CREB3L1(-3.46886489473)
ko04152	AMPK signaling pathway	3/305	121/7736	0.862037	0.935667	ENSG00000116678(-3.08075332626),ENSG00000102547(-2.59289684917),ENSG00000157613(-3.46886489473)	LEPR(-3.08075332626),CAB39L(-2.59289684917),CREB3L1(-3.46886489473)
ko04270	Vascular smooth muscle contraction	3/305	122/7736	0.865745	0.935667	ENSG00000163017(-2.19849385481),ENSG00000142875(-1.58645760792),ENSG00000178372(2.28405698116)	ACTG2(-2.19849385481),PRKACB(-1.58645760792),CALML5(2.28405698116)
ko04912	GnRH signaling pathway	2/305	89/7736	0.871784	0.935667	ENSG00000142875(-1.58645760792),ENSG00000178372(2.28405698116)	PRKACB(-1.58645760792),CALML5(2.28405698116)
ko04214	Apoptosis - fly	1/305	51/7736	0.872321	0.935667	ENSG00000176619(1.57297604675)	LMNB2(1.57297604675)
ko00190	Oxidative phosphorylation	4/305	157/7736	0.872701	0.935667	ENSG00000105929(-2.74550017858),ENSG00000185633(1.86365929887),ENSG00000161281(-1.91318622869),ENSG00000075673(-3.57930134594)	ATP6V0A4(-2.74550017858),NDUFA4L2(1.86365929887),COX7A1(-1.91318622869),ATP12A(-3.57930134594)
ko04350	TGF-beta signaling pathway	2/305	90/7736	0.875796	0.935667	ENSG00000011465(-1.39116160263),ENSG00000164093(2.65213071397)	DCN(-1.39116160263),PITX2(2.65213071397)
ko04142	Lysosome	3/305	127/7736	0.883003	0.935667	ENSG00000105929(-2.74550017858),ENSG00000134243(-1.79455418383),ENSG00000078081(3.36906470707)	ATP6V0A4(-2.74550017858),SORT1(-1.79455418383),LAMP3(3.36906470707)
ko04066	HIF-1 signaling pathway	2/305	95/7736	0.894176	0.935667	ENSG00000072274(2.84835228579),ENSG00000117394(1.72659061611)	TFRC(2.84835228579),SLC2A1(1.72659061611)
ko05210	Colorectal cancer	1/305	57/7736	0.899871	0.935667	ENSG00000170345(-2.48416997805)	FOS(-2.48416997805)
ko05014	Amyotrophic lateral sclerosis (ALS)	1/305	59/7736	0.907668	0.935667	ENSG00000015475(2.08689841431)	BID(2.08689841431)
ko05321	Inflammatiory bowel disease (IBD)	3/305	138/7736	0.9142	0.935667	ENSG00000115415(2.41661405209),ENSG00000125538(3.55477624544),ENSG00000081985(3.33600338012)	STAT1(2.41661405209),IL1B(3.55477624544),IL12RB2(3.33600338012)
ko05230	Central carbon metabolism in cancer	1/305	64/7736	0.924612	0.935667	ENSG00000117394(1.72659061611)	SLC2A1(1.72659061611)
ko05310	Asthma	2/305	106/7736	0.92608	0.935667	ENSG00000179639(-3.54653205369),ENSG00000172156(3.23266469762)	FCER1A(-3.54653205369),CCL11(3.23266469762)
ko05211	Renal cell carcinoma	1/305	65/7736	0.927609	0.935667	ENSG00000117394(1.72659061611)	SLC2A1(1.72659061611)
ko03013	RNA transport	4/305	180/7736	0.929429	0.935667	ENSG00000100401(1.67066622787),ENSG00000104356(2.10560742274),ENSG00000013810(1.39830107769),ENSG00000137574(1.61965117908)	RANGAP1(1.67066622787),POP1(2.10560742274),TACC3(1.39830107769),TGS1(1.61965117908)
ko05412	Arrhythmogenic right ventricular cardiomyopathy (ARVC)	1/305	66/7736	0.930488	0.935667	ENSG00000175084(-3.20663968422)	DES(-3.20663968422)
ko04072	Phospholipase D signaling pathway	3/305	146/7736	0.931926	0.935667	ENSG00000162407(-1.55382666649),ENSG00000179639(-3.54653205369),ENSG00000169429(5.55269743382)	PLPP3(-1.55382666649),FCER1A(-3.54653205369),CXCL8(5.55269743382)
ko04742	Taste transduction	2/305	110/7736	0.935251	0.935667	ENSG00000168447(-2.17608205216),ENSG00000142875(-1.58645760792)	SCNN1B(-2.17608205216),PRKACB(-1.58645760792)
ko00010	Glycolysis / Gluconeogenesis	1/305	68/7736	0.935906	0.935667	ENSG00000196616(-6.5653559564)	ADH1B(-6.5653559564)
ko04210	Apoptosis	3/305	151/7736	0.94123	0.935667	ENSG00000176619(1.57297604675),ENSG00000015475(2.08689841431),ENSG00000170345(-2.48416997805)	LMNB2(1.57297604675),BID(2.08689841431),FOS(-2.48416997805)
ko04212	Longevity regulating pathway - worm	1/305	73/7736	0.947682	0.935667	ENSG00000205364(-2.30899568642)	MT1M(-2.30899568642)
ko04721	Synaptic vesicle cycle	1/305	73/7736	0.947682	0.935667	ENSG00000105929(-2.74550017858)	ATP6V0A4(-2.74550017858)
ko04672	Intestinal immune network for IgA production	2/305	118/7736	0.950462	0.935667	ENSG00000162896(-5.89456222367),ENSG00000107562(-4.50458837234)	PIGR(-5.89456222367),CXCL12(-4.50458837234)
ko04213	Longevity regulating pathway - multiple species	1/305	75/7736	0.951764	0.935667	ENSG00000142875(-1.58645760792)	PRKACB(-1.58645760792)
ko04664	Fc epsilon RI signaling pathway	1/305	75/7736	0.951764	0.935667	ENSG00000179639(-3.54653205369)	FCER1A(-3.54653205369)
ko01230	Biosynthesis of amino acids	1/305	76/7736	0.953684	0.935667	ENSG00000104524(1.97712190212)	PYCR3(1.97712190212)
ko04520	Adherens junction	1/305	76/7736	0.953684	0.935667	ENSG00000095637(-1.95479026606)	SORBS1(-1.95479026606)
ko01521	EGFR tyrosine kinase inhibitor resistance	1/305	79/7736	0.959	0.935667	ENSG00000157168(3.61006215909)	NRG1(3.61006215909)
ko04611	Platelet activation	2/305	124/7736	0.95957	0.935667	ENSG00000142875(-1.58645760792),ENSG00000068831(-2.23413888574)	PRKACB(-1.58645760792),RASGRP2(-2.23413888574)
ko04940	Type I diabetes mellitus	3/305	164/7736	0.960198	0.935667	ENSG00000155093(-2.77605064601),ENSG00000003147(-2.1071713388),ENSG00000125538(3.55477624544)	PTPRN2(-2.77605064601),ICA1(-2.1071713388),IL1B(3.55477624544)
ko04146	Peroxisome	1/305	82/7736	0.963707	0.935667	ENSG00000168306(-2.04734180989)	ACOX2(-2.04734180989)
ko05016	Huntington's disease	4/305	206/7736	0.96537	0.935667	ENSG00000185633(1.86365929887),ENSG00000173805(5.07945444709),ENSG00000161281(-1.91318622869),ENSG00000157613(-3.46886489473)	NDUFA4L2(1.86365929887),HAP1(5.07945444709),COX7A1(-1.91318622869),CREB3L1(-3.46886489473)
ko03040	Spliceosome	3/305	171/7736	0.967869	0.935667	ENSG00000179950(1.43788912452),ENSG00000125835(1.86072083915),ENSG00000100410(1.66361660985)	PUF60(1.43788912452),SNRPB(1.86072083915),PHF5A(1.66361660985)
ko05169	Epstein-Barr virus infection	5/305	245/7736	0.96815	0.935667	ENSG00000107201(2.70637111339),ENSG00000026025(-1.12858974562),ENSG00000142875(-1.58645760792),ENSG00000145604(1.60497964918),ENSG00000177455(-2.62379346353)	DDX58(2.70637111339),VIM(-1.12858974562),PRKACB(-1.58645760792),SKP2(1.60497964918),CD19(-2.62379346353)
ko05152	Tuberculosis	5/305	246/7736	0.968984	0.935667	ENSG00000105929(-2.74550017858),ENSG00000115415(2.41661405209),ENSG00000015475(2.08689841431),ENSG00000125538(3.55477624544),ENSG00000178372(2.28405698116)	ATP6V0A4(-2.74550017858),STAT1(2.41661405209),BID(2.08689841431),IL1B(3.55477624544),CALML5(2.28405698116)
ko04810	Regulation of actin cytoskeleton	4/305	211/7736	0.969944	0.935667	ENSG00000140285(-2.56956441411),ENSG00000161958(2.06942181785),ENSG00000070087(3.17645113454),ENSG00000006747(-2.5055006515)	FGF7(-2.56956441411),FGF11(2.06942181785),PFN2(3.17645113454),SCIN(-2.5055006515)
ko04012	ErbB signaling pathway	1/305	87/7736	0.970386	0.935667	ENSG00000157168(3.61006215909)	NRG1(3.61006215909)
ko04540	Gap junction	1/305	95/7736	0.978618	0.935667	ENSG00000142875(-1.58645760792)	PRKACB(-1.58645760792)
ko03010	Ribosome	2/305	148/7736	0.982367	0.935667	ENSG00000171421(1.66492779954),ENSG00000137547(1.49324193019)	MRPL36(1.66492779954),MRPL15(1.49324193019)
ko04070	Phosphatidylinositol signaling system	1/305	100/7736	0.982559	0.935667	ENSG00000178372(2.28405698116)	CALML5(2.28405698116)
ko05145	Toxoplasmosis	3/305	204/7736	0.988682	0.935667	ENSG00000058085(3.60737768008),ENSG00000115415(2.41661405209),ENSG00000196878(2.01060054618)	LAMC2(3.60737768008),STAT1(2.41661405209),LAMB3(2.01060054618)
ko01200	Carbon metabolism	1/305	116/7736	0.990921	0.935667	ENSG00000178445(4.48963948504)	GLDC(4.48963948504)
ko04141	Protein processing in endoplasmic reticulum	2/305	185/7736	0.9953	0.935667	ENSG00000111885(-1.84476060244),ENSG00000117643(-1.81500632797)	MAN1A1(-1.84476060244),MAN1C1(-1.81500632797)
ko05332	Graft-versus-host disease	1/305	148/7736	0.99755	0.935667	ENSG00000125538(3.55477624544)	IL1B(3.55477624544)
ko04145	Phagosome	4/305	297/7736	0.997817	0.935667	ENSG00000105929(-2.74550017858),ENSG00000072274(2.84835228579),ENSG00000005381(-6.57302653166),ENSG00000116701(1.95084718703)	ATP6V0A4(-2.74550017858),TFRC(2.84835228579),MPO(-6.57302653166),NCF2(1.95084718703)
ko05150	Staphylococcus aureus infection	1/305	154/7736	0.998085	0.935667	ENSG00000197766(-2.57383871762)	CFD(-2.57383871762)
ko05416	Viral myocarditis	1/305	162/7736	0.998621	0.935667	ENSG00000015475(2.08689841431)	BID(2.08689841431)
ko05322	Systemic lupus erythematosus	2/305	221/7736	0.99875	0.935667	ENSG00000112936(-5.59381849248),ENSG00000125835(1.86072083915)	C7(-5.59381849248),SNRPB(1.86072083915)
ko04144	Endocytosis	3/305	306/7736	0.999653	0.935667	ENSG00000072274(2.84835228579),ENSG00000116489(-1.25483416686),ENSG00000169252(-2.27869339667)	TFRC(2.84835228579),CAPZA1(-1.25483416686),ADRB2(-2.27869339667)
ko04650	Natural killer cell mediated cytotoxicity	4/305	402/7736	0.999937	0.935667	ENSG00000101096(-1.88727649793),ENSG00000015475(2.08689841431),ENSG00000117091(-1.79636350187),ENSG00000131015(2.90286148032)	NFATC2(-1.88727649793),BID(2.08689841431),CD48(-1.79636350187),ULBP2(2.90286148032)
ko04740	Olfactory transduction	5/305	517/7736	0.999994	0.935667	ENSG00000186642(-1.72059149767),ENSG00000142875(-1.58645760792),ENSG00000176533(-2.48032893421),ENSG00000178372(2.28405698116),ENSG00000141404(-1.76114681841)	PDE2A(-1.72059149767),PRKACB(-1.58645760792),GNG7(-2.48032893421),CALML5(2.28405698116),GNAL(-1.76114681841)
